# Supplementary material for: A DNA methylation map of human cancer at single base-pair resolution
Source: PubMed Central journal article supplement (PMC5633654; doi:10.1038/onc.2017.176), 2017-06-05
Supplement: onc2017176x1.pdf [file onc2017176x1.pdf]

## **Supplemental Information**

Supplemental figure legends: Figures S1-S17

Supplemental tables: Tables S1-S3

## Supplemental figure legends

**Figure S1. Principle component analysis (PCA) separated normal tissues, primary tumor samples and cancer cell lines.** PCA of CpG methylation levels obtained from WGBS of 22 human samples. Tissues of origin are color-coded and matched samples are indicated (bold line). Distinct sample sources are highlighted (circled).

**Figure S2. Repetitive elements loose DNA methylation in cancer samples.** Average DNA methylation levels of repetitive elements (RepeatMasker) obtained from WGBS of normal tissues and cancer samples.

**Figure S3. Gradient genome-wide loss of DNA methylation level and integrity from normal tissue to cancer metastasis.** (a) Whole-genome representation of DNA methylation levels (5Mbp windows) of normal breast tissue and donor-matched primary and metastatic breast cancer samples. (b) Correlation of DNA methylation levels between neighboring CpG sites in normal breast, primary tumor and metastasis.

**Figure S4. Active regulatory region frequently overlap with hypomethylated regions (HMRs).** Frequency of histone mark defined regulatory regions overlapping with HMRs in normal breast, B-cells and liver tissue.

**Figure S5. Hypomethylated regions (HMRs) in house-keeping gene promoters.** (a-f) Representative HMRs overlapping promoters of the housekeeping genes. Smoothed (upper panel) and base-pair resolution (lower panels) representation display DNA methylation levels of 9 normal tissue samples. Transcription start site (broken line) and direction (+/-) are indicated.

**Figure S6. Hypomethylated regions (HMRs) distal to promoters enriched in tissue specific target genes.** Enrichment analysis in biological processes for t-HMRs distal to gene promoters (<10kb, Bonferroni adjusted p-value).

**Figure S7. Validation of WGBS-derived HMR in 114 normal tissue samples.** (a) Percentage of validated c-HMRs as a function of the threshold applied on the average HMR methylation measured by the HumanMethylation450 BeadChip (solid lines). Corresponding thresholds to validate 95% of c-HMRs is indicated per tissue type.

Dashed horizontal line spots 95% of c-HMRs validated. (b) ROC curves for the validation of t-HMR (solid lines). The Area Under the Curve (AUC) per tissue type is indicated.

**Figure S8. Hierarchical clustering using t-HMRs splits normal samples into tissue of origin.** Hierarchical cluster of 114 normal samples and DNA methylation levels from 9,391 t-HMRs interrogated by the BeadChip. Average HMR methylation levels are gradiently color-coded from 0% (light blue) to 100% (dark blue).

**Figure S9. Hypermethylation of common HMRs (c-HMRs) 1,112 primary cancer samples.** (a) Frequency of hypermethylation of c-HMRs in 1,112 cancer samples analyzed using the HumanMethylation450 BeadChip. Dashed line separates c-HMRs with high (>25% of samples) hypermethylation frequencies. (b) Variance profile of c-HMRs, inside and outside promoter regions, of 1,112 samples split by cancer type.

**Figure S10. Genome-scale DNA methylation analysis of 1,112 cancer samples revealed cancer type specific signatures outside the promoter context.** (a) Unsupervised hierarchical clustering of 1,112 cancer samples and 3,236 hypermethylated HMRs outside gene promoters using Jaccard distances and the Ward cluster method. Average HMR methylation levels are gradiently color-coded from 0% (light blue) to 100% (dark blue). (b) Frequently hypermethylated HMRs outside promoters near tumor-suppressor genes (<10kb) of 1,112 samples ordered by cancer type. HMR methylation status is categorized in hyper- (>33% DNA methylation, dark blue) and hypomethylated (<33% DNA methylation, light blue).

**Figure S11. Proportion of c-HMRs frequently gaining DNA methylation in cancer stratified by regulatory segments defined in the respective normal tissues.** The analysis is split by normal-cancer type pair and each point and error bar (95 % CI) represent one segmentation category.

**Figure S12. DNA hypermethylation revealed mutual exclusivity in cancer pathways.** (a) DNA hypermethylation events in promoter associated c-HMRs (black boxes) of genes related to Non-small cell lung cancer pathogenesis (KEGG). Selected genes show significant patterns of mutual exclusivity (empirical  $p < 0.01$ ). Displayed are hypermethylation events in lung adenocarcinoma (LAD, purple) and lung squamous cell carcinomas (LSQ, blue). (b) Mutual exclusivity analysis of recurrent hypermethylation events in PIK3 subunits (*PIK3R1*, *PIK3R2*, *PIK3R5*) in LAD (purple),

small-cell lung cancer (SCLC, pink) and LSQ (blue). (c) Genes involved in chemical induced carcinogenesis (KEGG) revealed significant (empirical  $p < 0.01$ ) mutually exclusive patterns in LAD (purple), LSQ (blue) and SCLC (pink).

**Figure S13. Cancer type specific hypermethylation of gene promoters.** DNA hypermethylated putative tumor-suppressor genes with tissues specific patterns ( $OR > 30$ ). Tumor-suppressor genes were defined by recurrent alterations including mutation (blue), hypermethylation (red) or deletion (orange) events in cancer.

**Figure S14. DNA methylation alterations in human cancer samples.** Size distribution and DNA methylation levels of total HMRs in normal tissues (a), primary tumors (b), metastatic progression (c) and cancer cell lines (d). Densities are displayed from low (blue) to high (red).

**Figure S15. Distribution of HMRs analyzed by MethylSeekR.** Average DNA methylation of HMRs (y-axis) and size (x-axis) in normal colon (left panel), primary tumor (central panel) and metastasis (right panel) as classified by MethylSeekR. Regions are split in Partially Methylated Domains (PMD), Low Methylation Regions (LMR), Unmethylated regions (UMR) or only classified previously as HMR. Each pixel represents an HMR region. PMD detection was not performed on the normal colon sample.

**Figure S16. Promoter hypermethylation of cancer genes identified by WGBS.** Promoter methylation profiles derived from WGBS data identified hypermethylation of (a) *MGMT* in glioblastoma (U87MG), (b) *NSD1* in neuro- and glioblastoma (SH5YSY, U87MG), (c) *GSTP1* in prostate cancer (22RV1) and (d) *MLH1* in matched primary and metastatic colorectal cancer samples.

**Figure S17. Profound changes in the DNA methylation structure at tissue-specific HMRs (t-HMRs) in cancer samples.** DNA methylation structure of t-HMRs in normal (a) and cancer (b) samples. CpG methylation levels are averaged in 4bp windows over all c-HMRs and displayed  $\pm$  2kb flanking the HMR center. For cancer samples only tissue-matched t-HMRs are displayed.

Figure S1

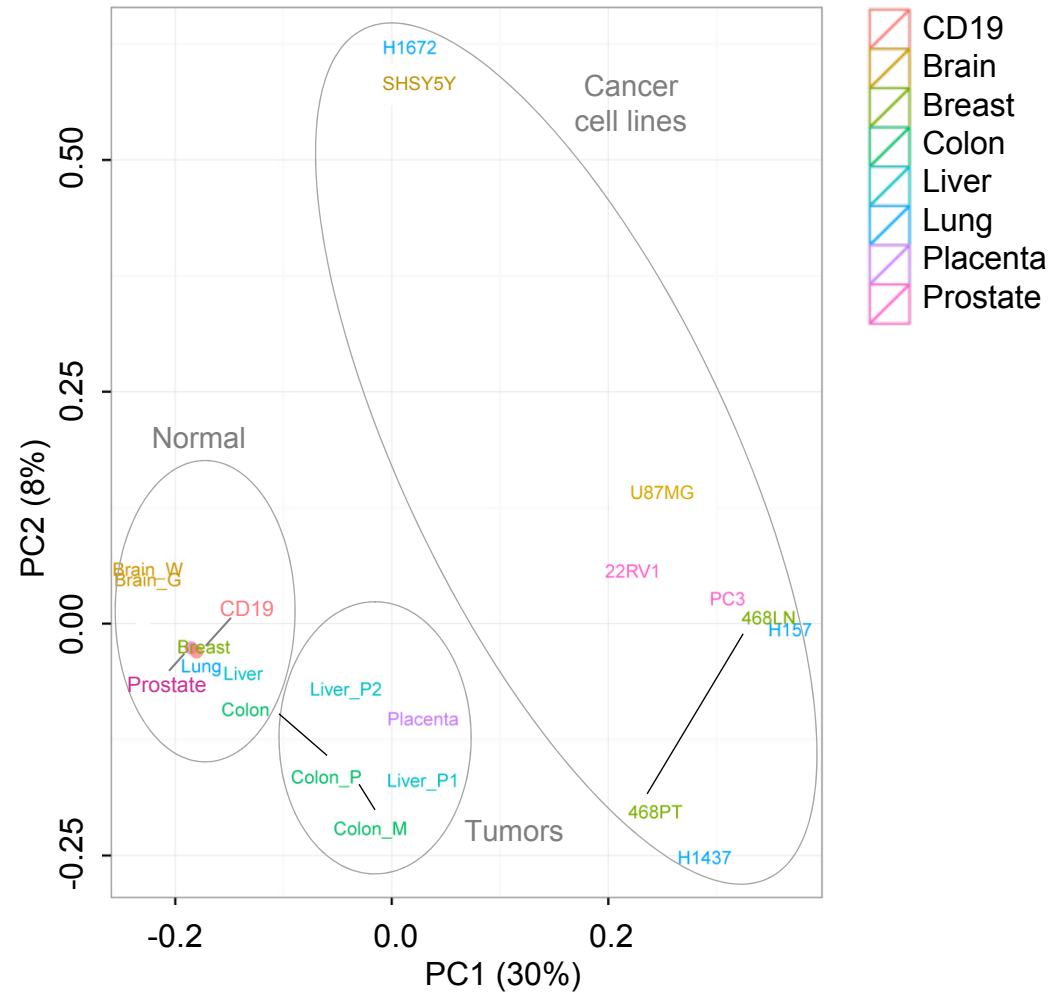

Figure S2

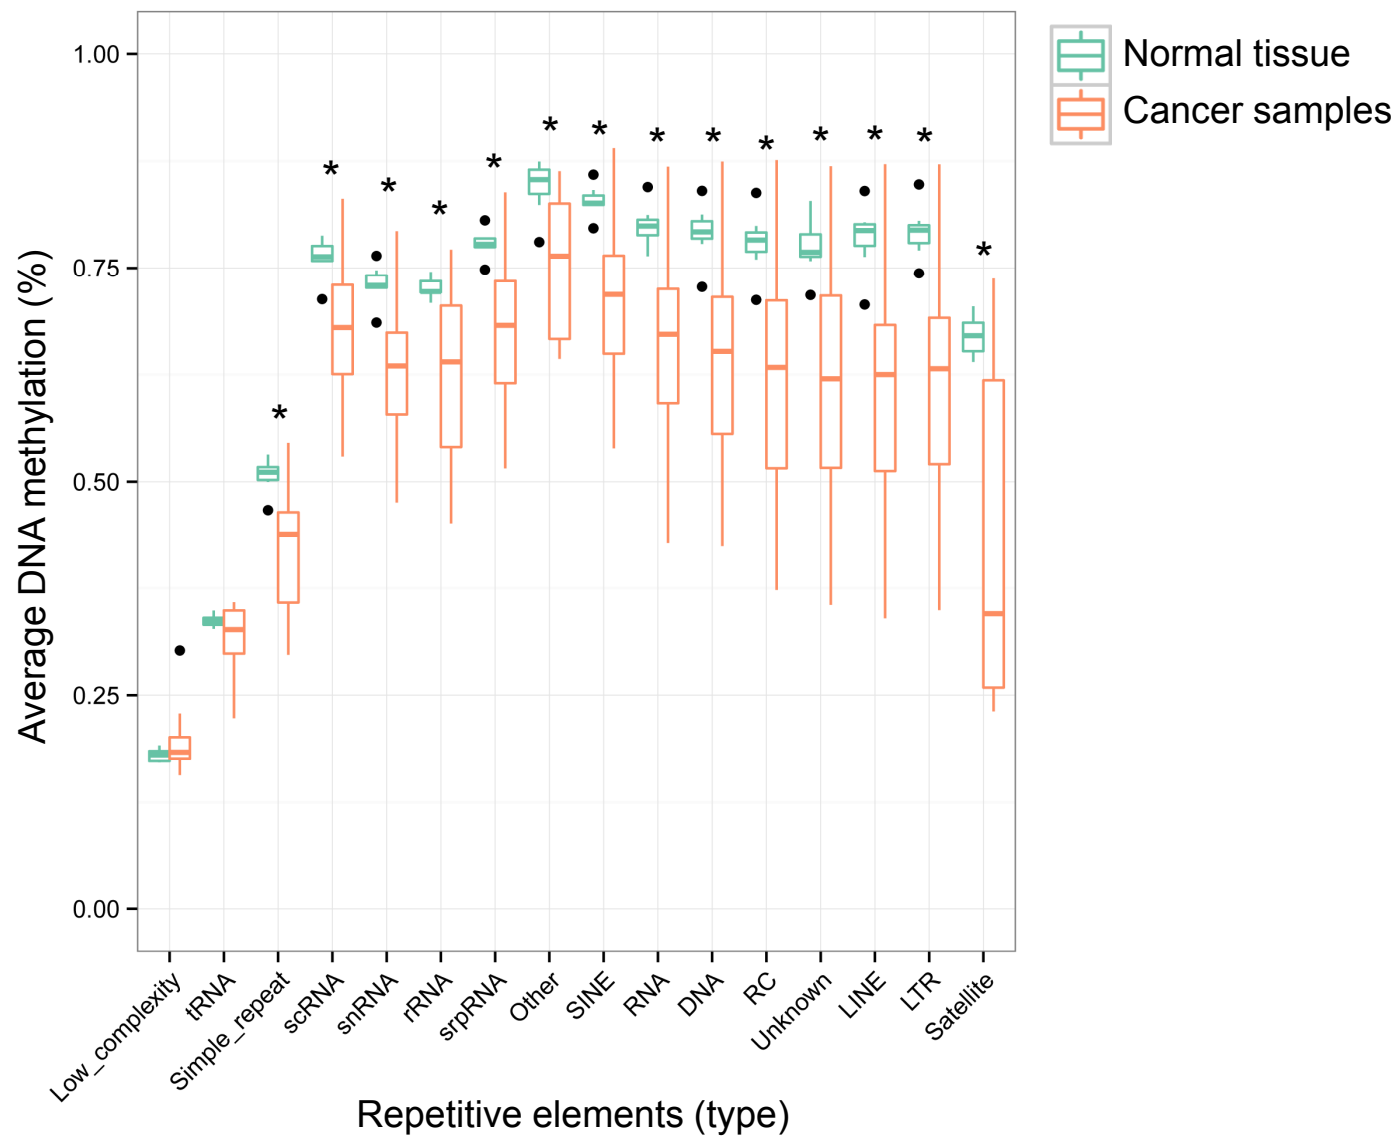

Figure S3

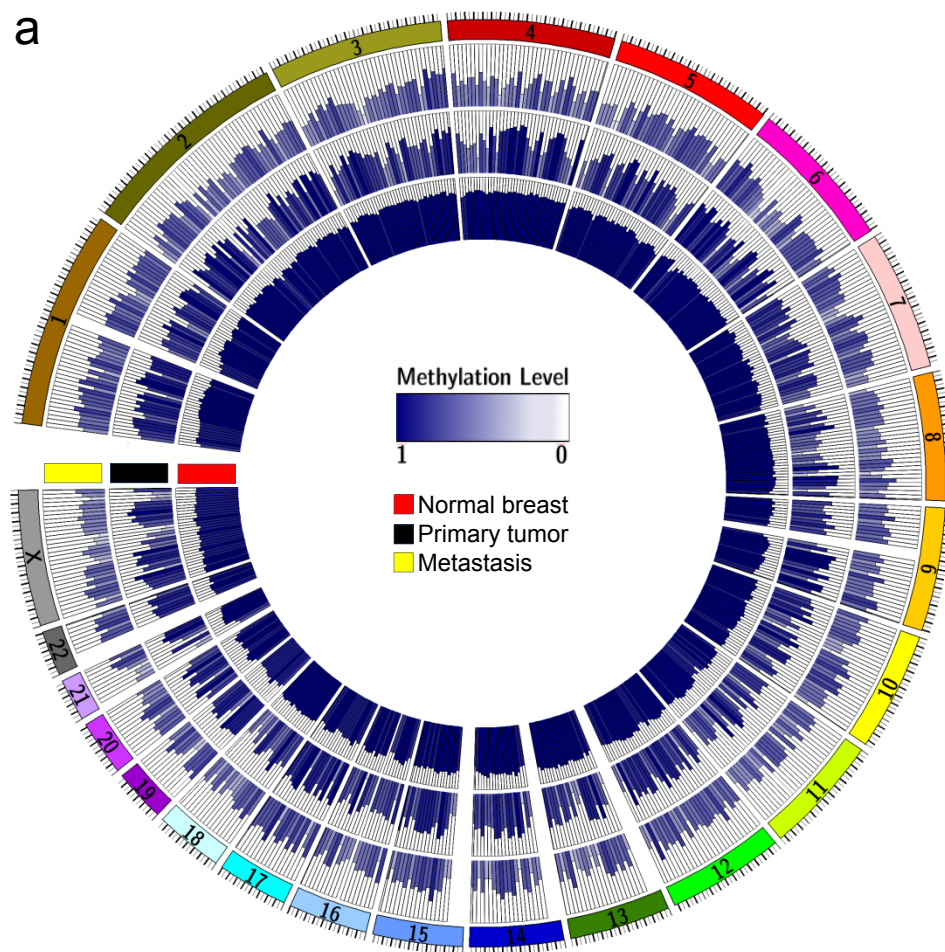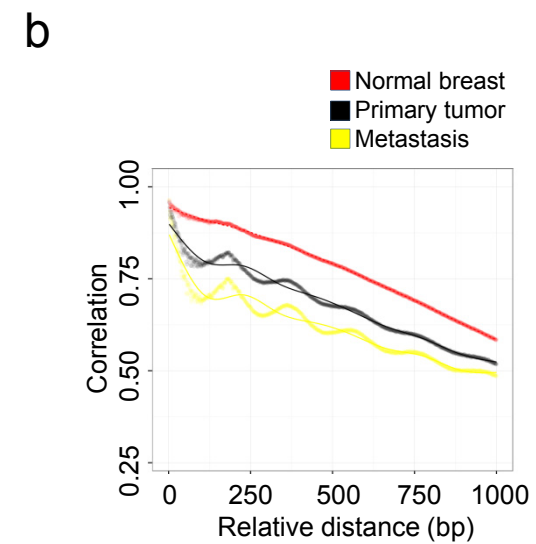

Figure S4

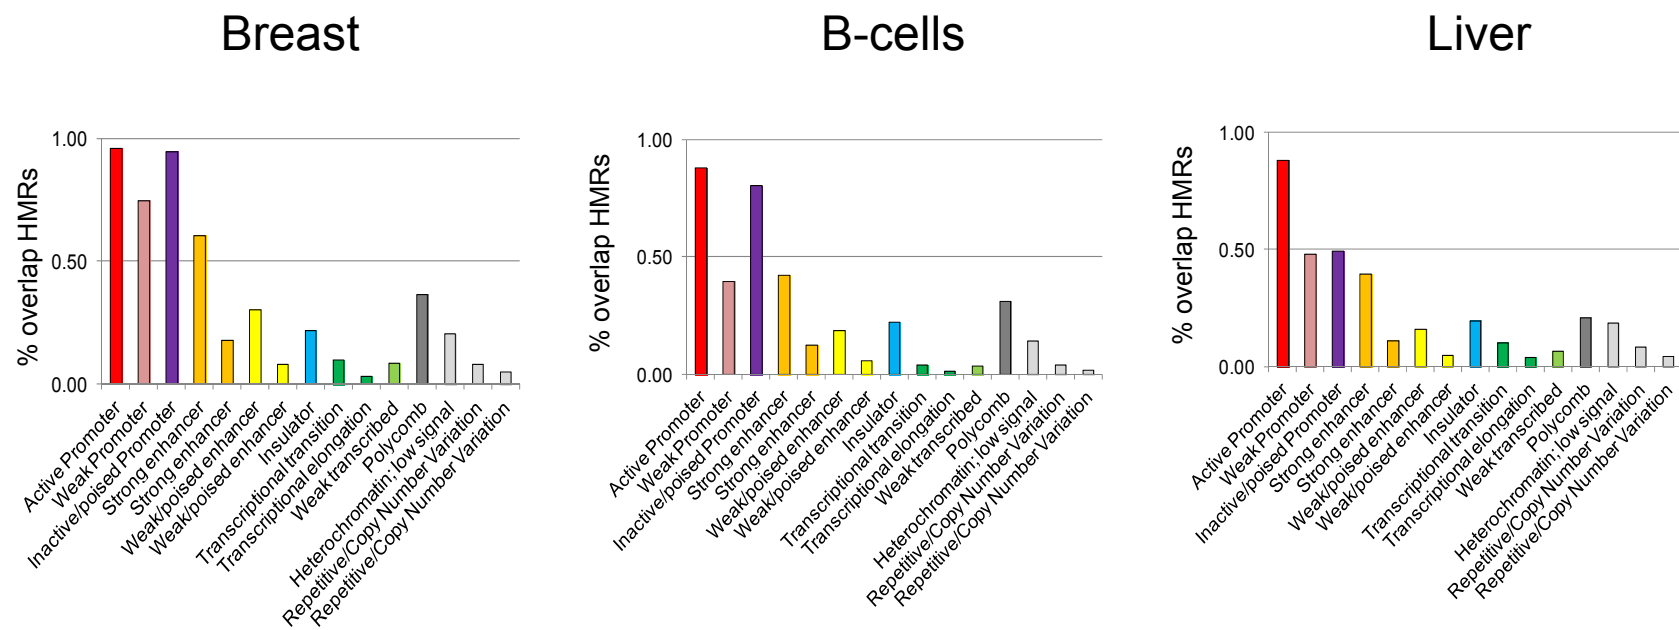



Figure S5

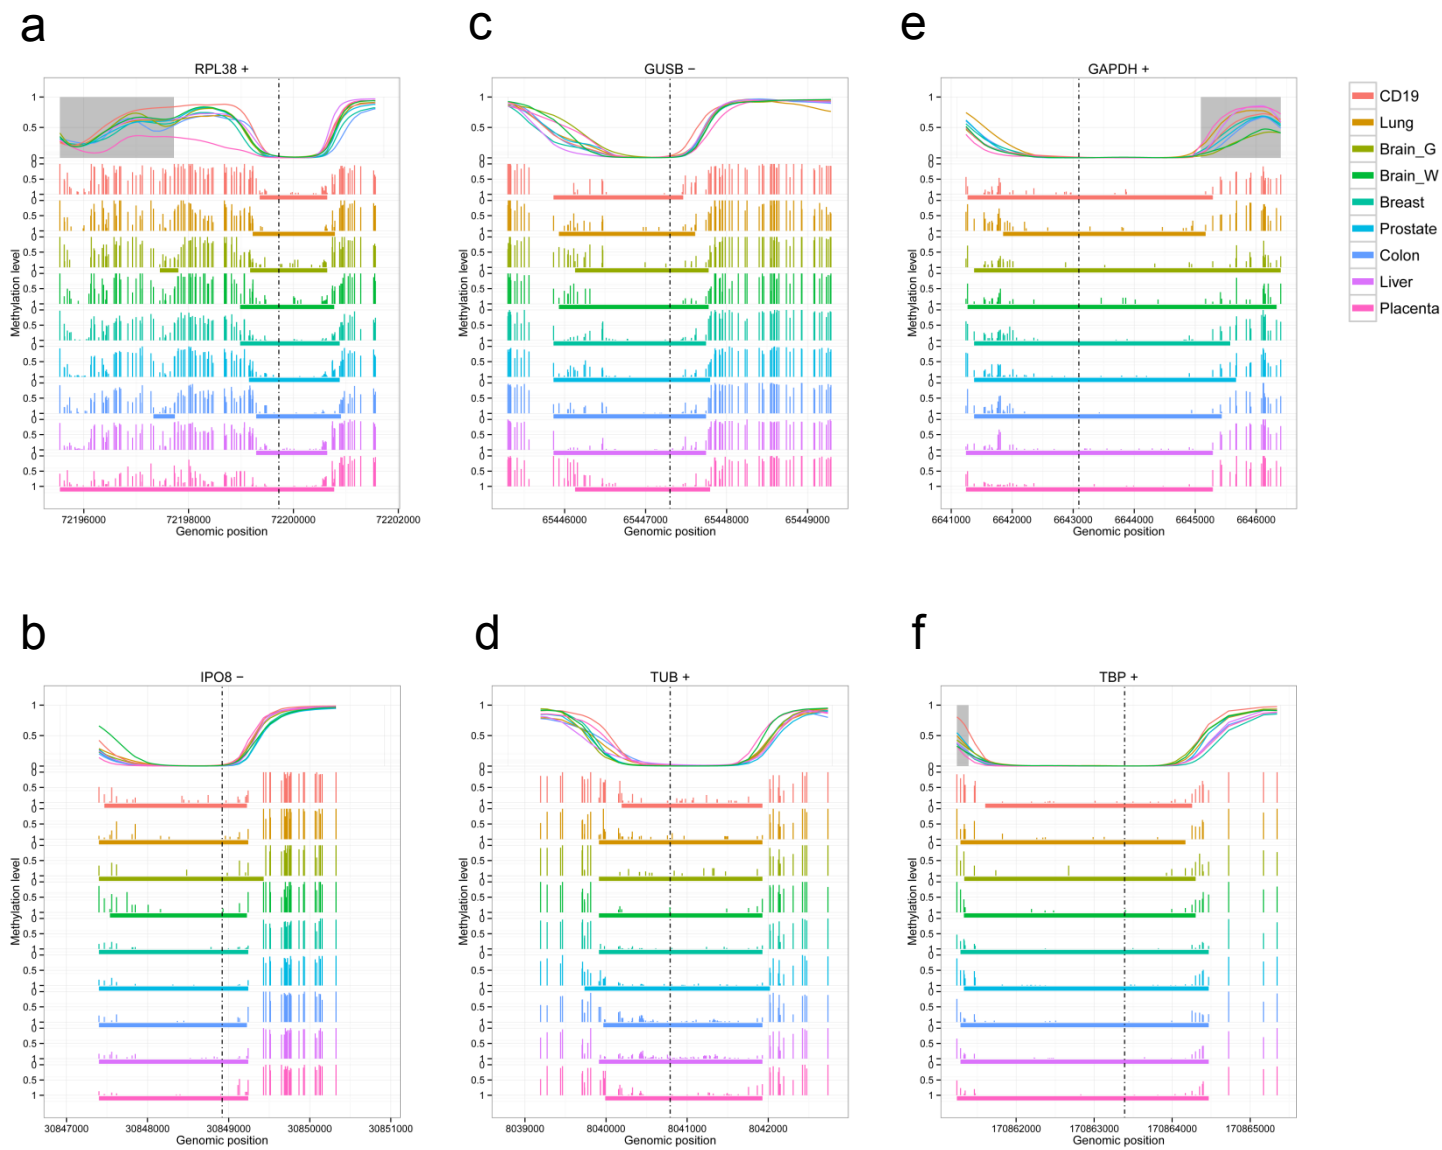

Distal t-HMRs <10 kb distance from TSS

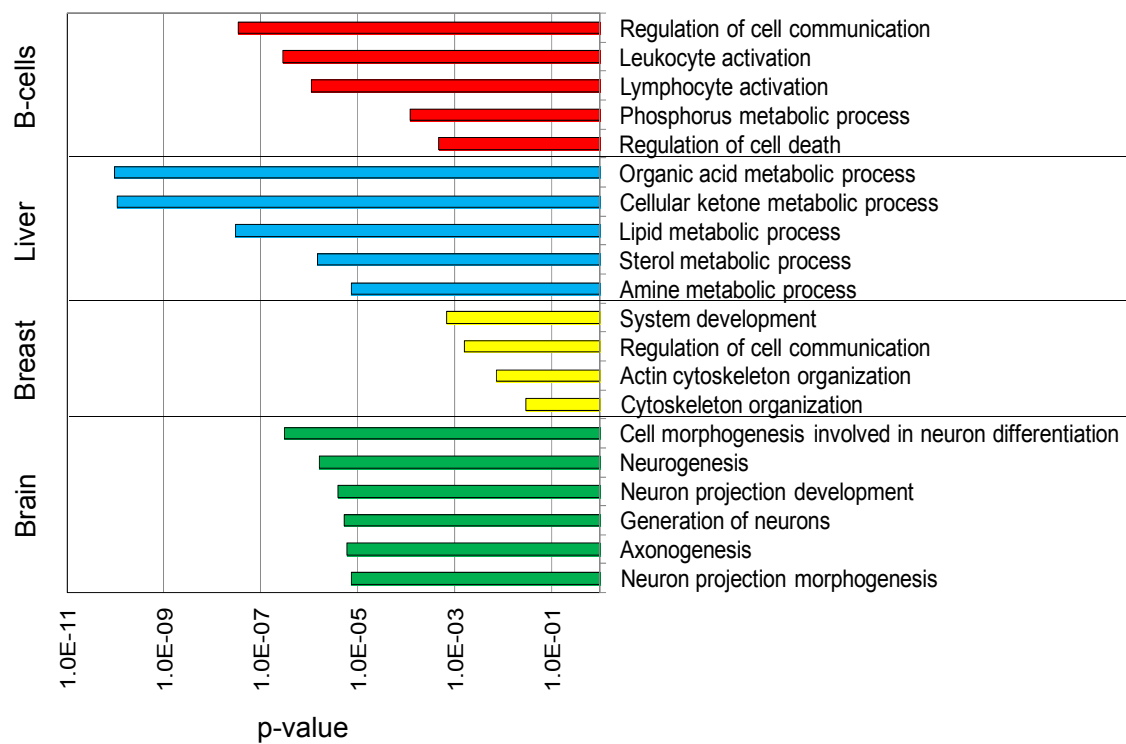

Figure S7

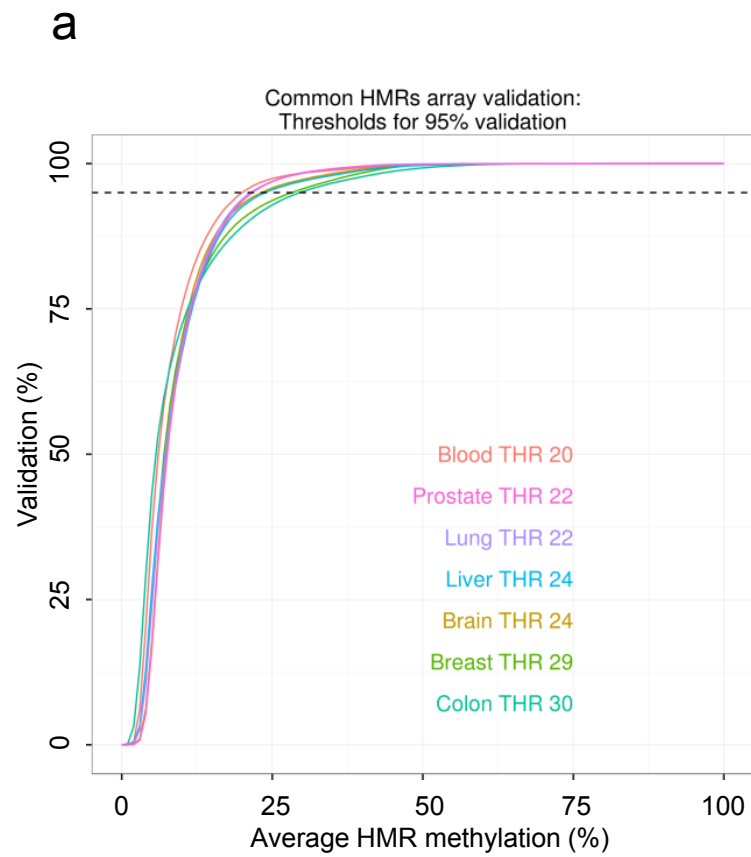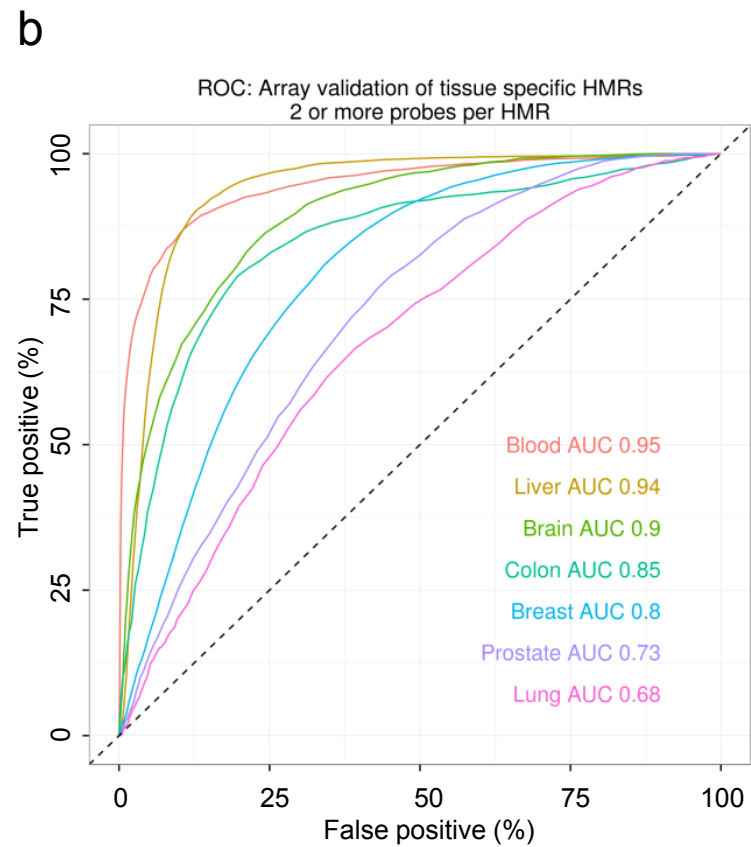

Figure S8

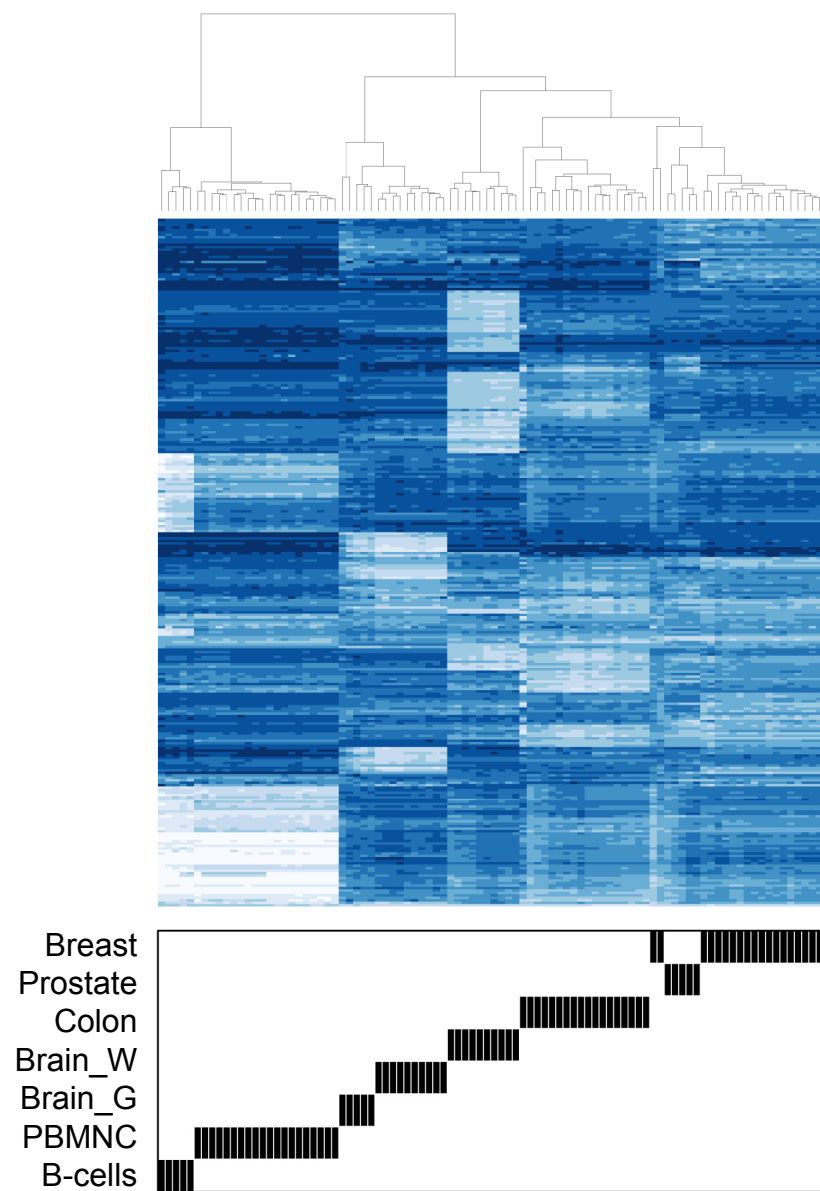

Figure S9

a

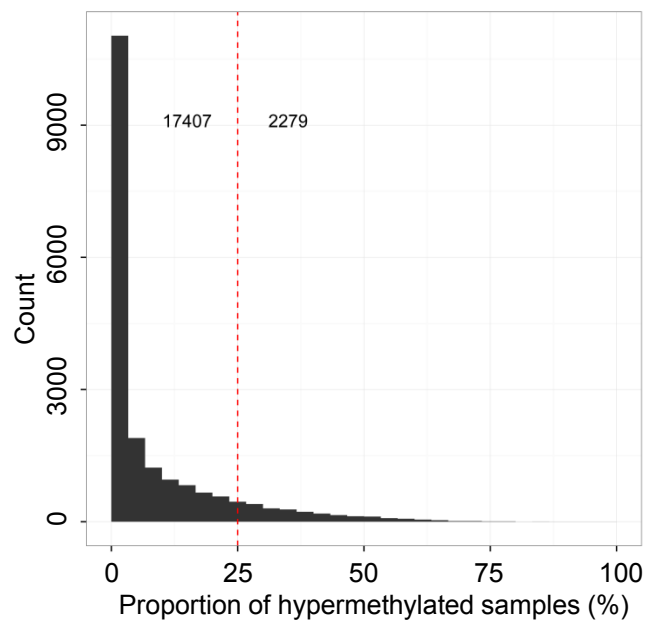

b

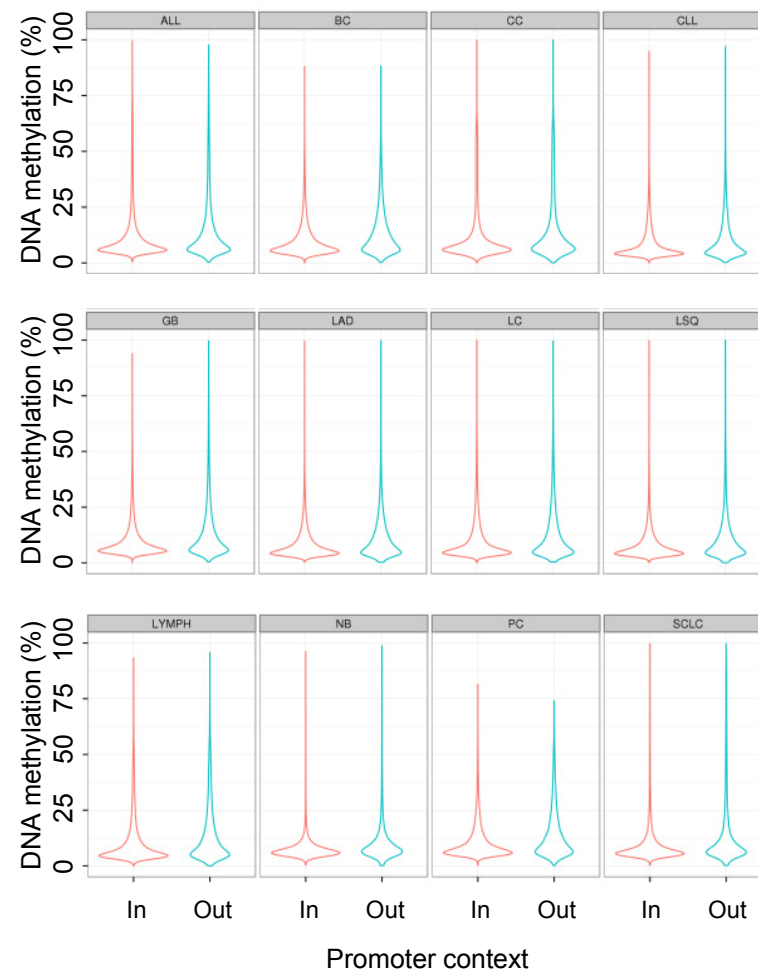

Figure S10

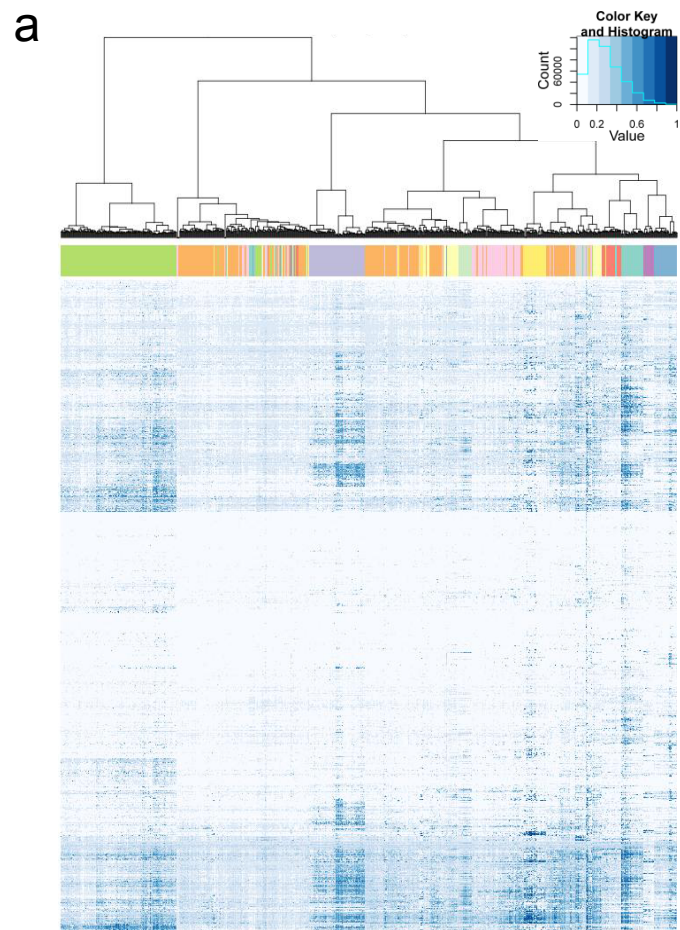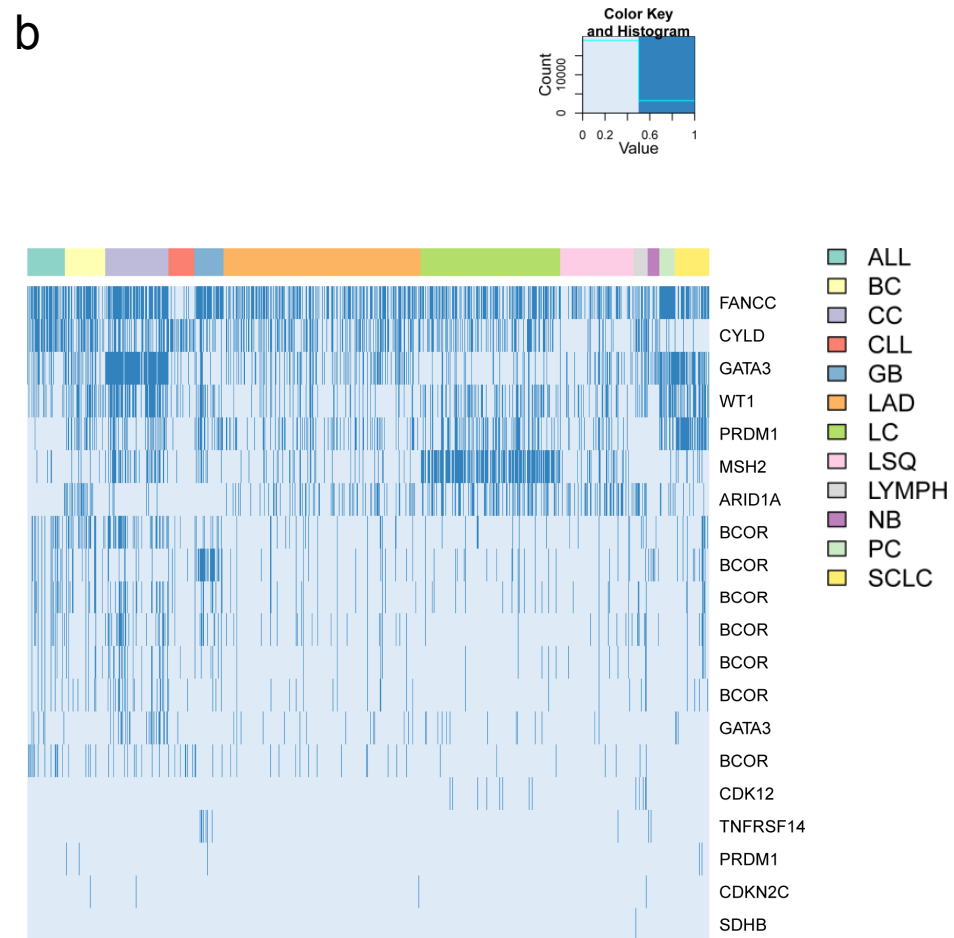

Figure S11

Breast cancer

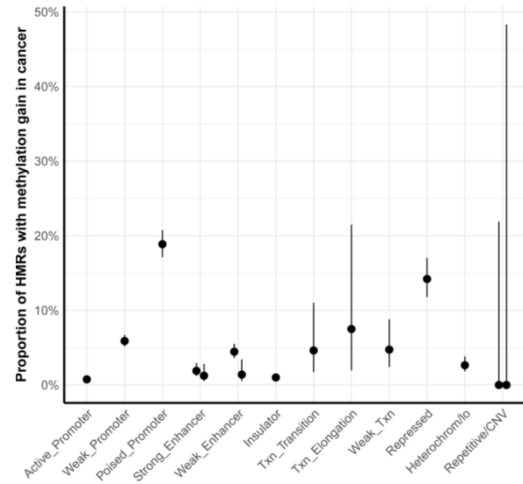

Liver cancer

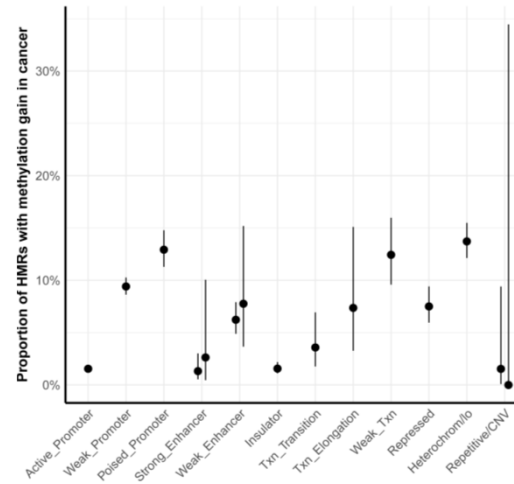

ALL

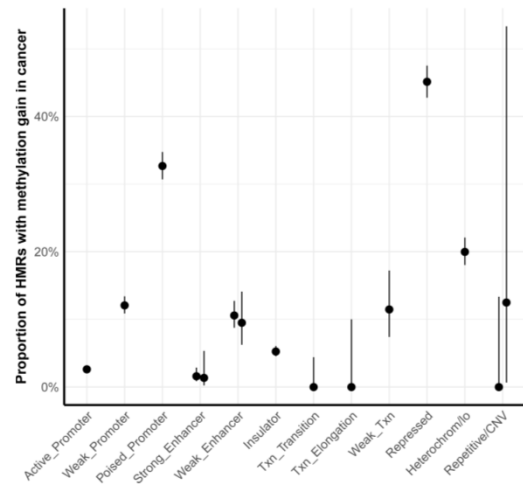

Lymphoma

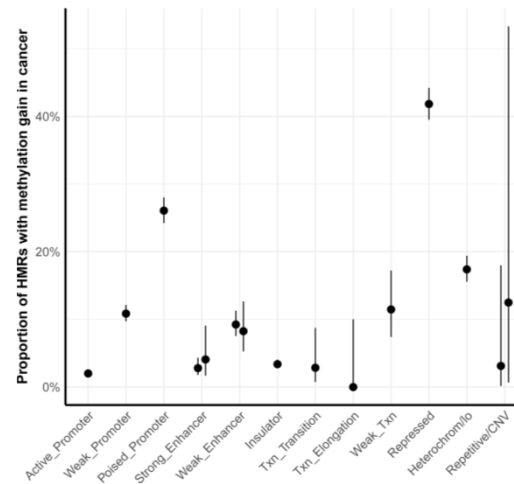

CLL

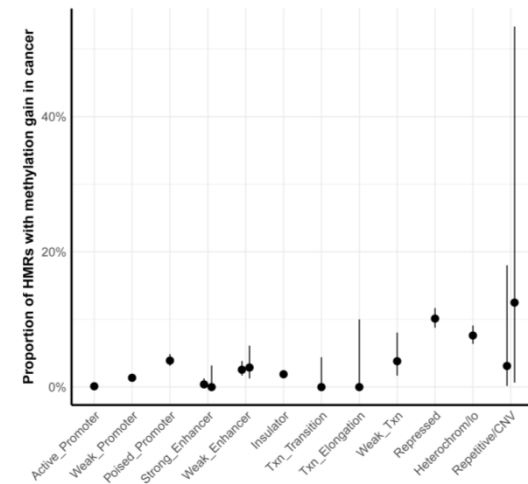

Figure 12

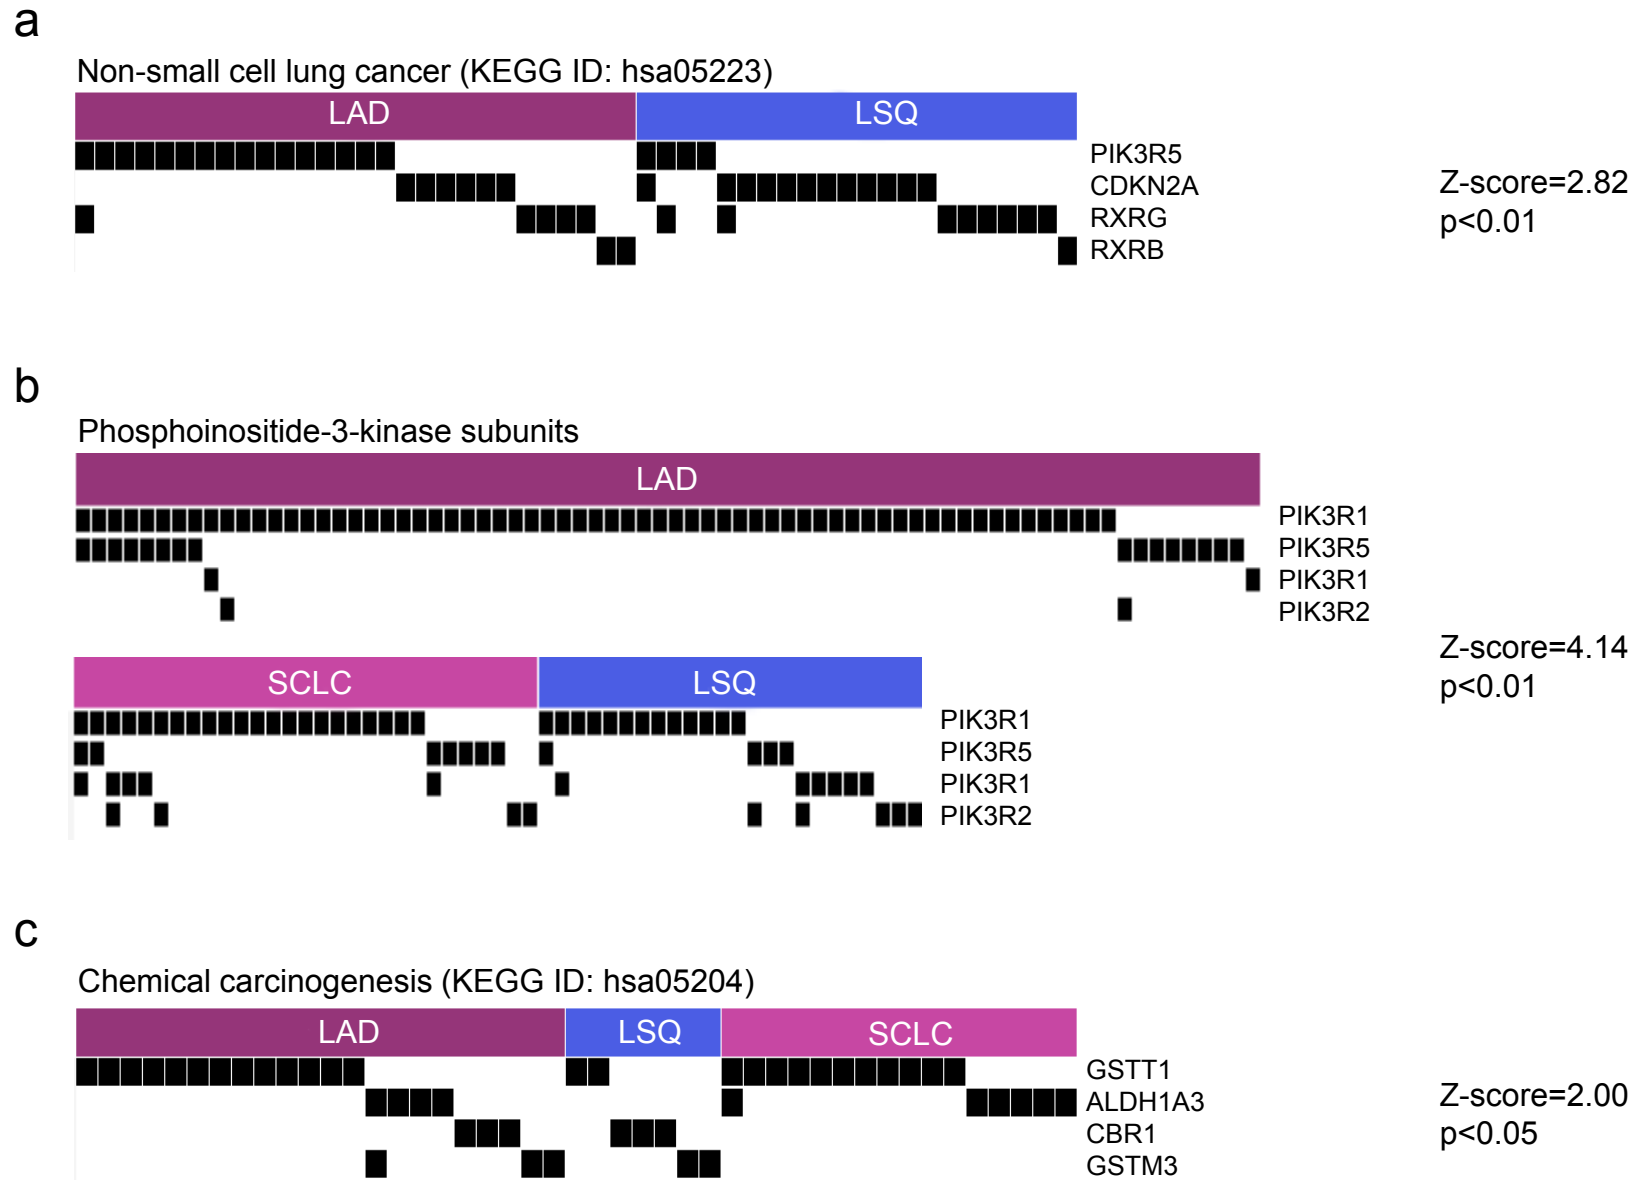



Figure 13

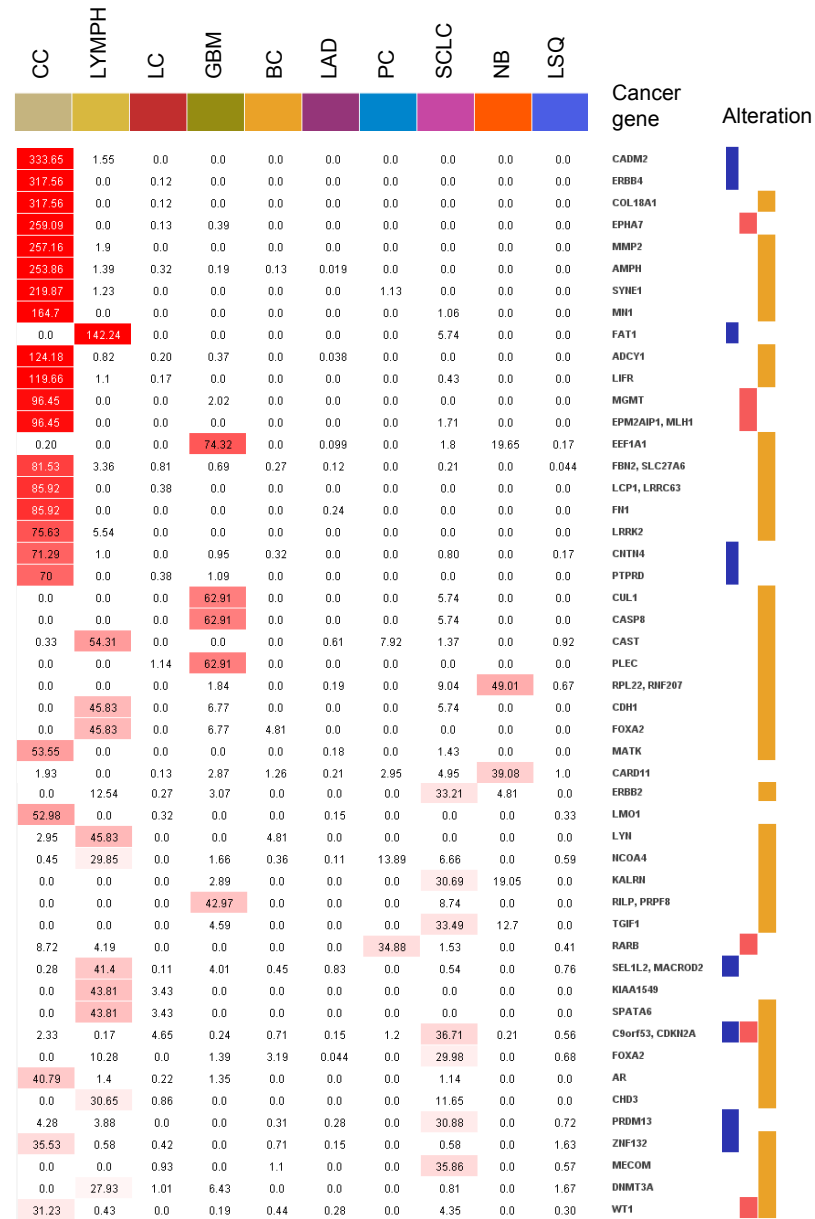

Figure S14

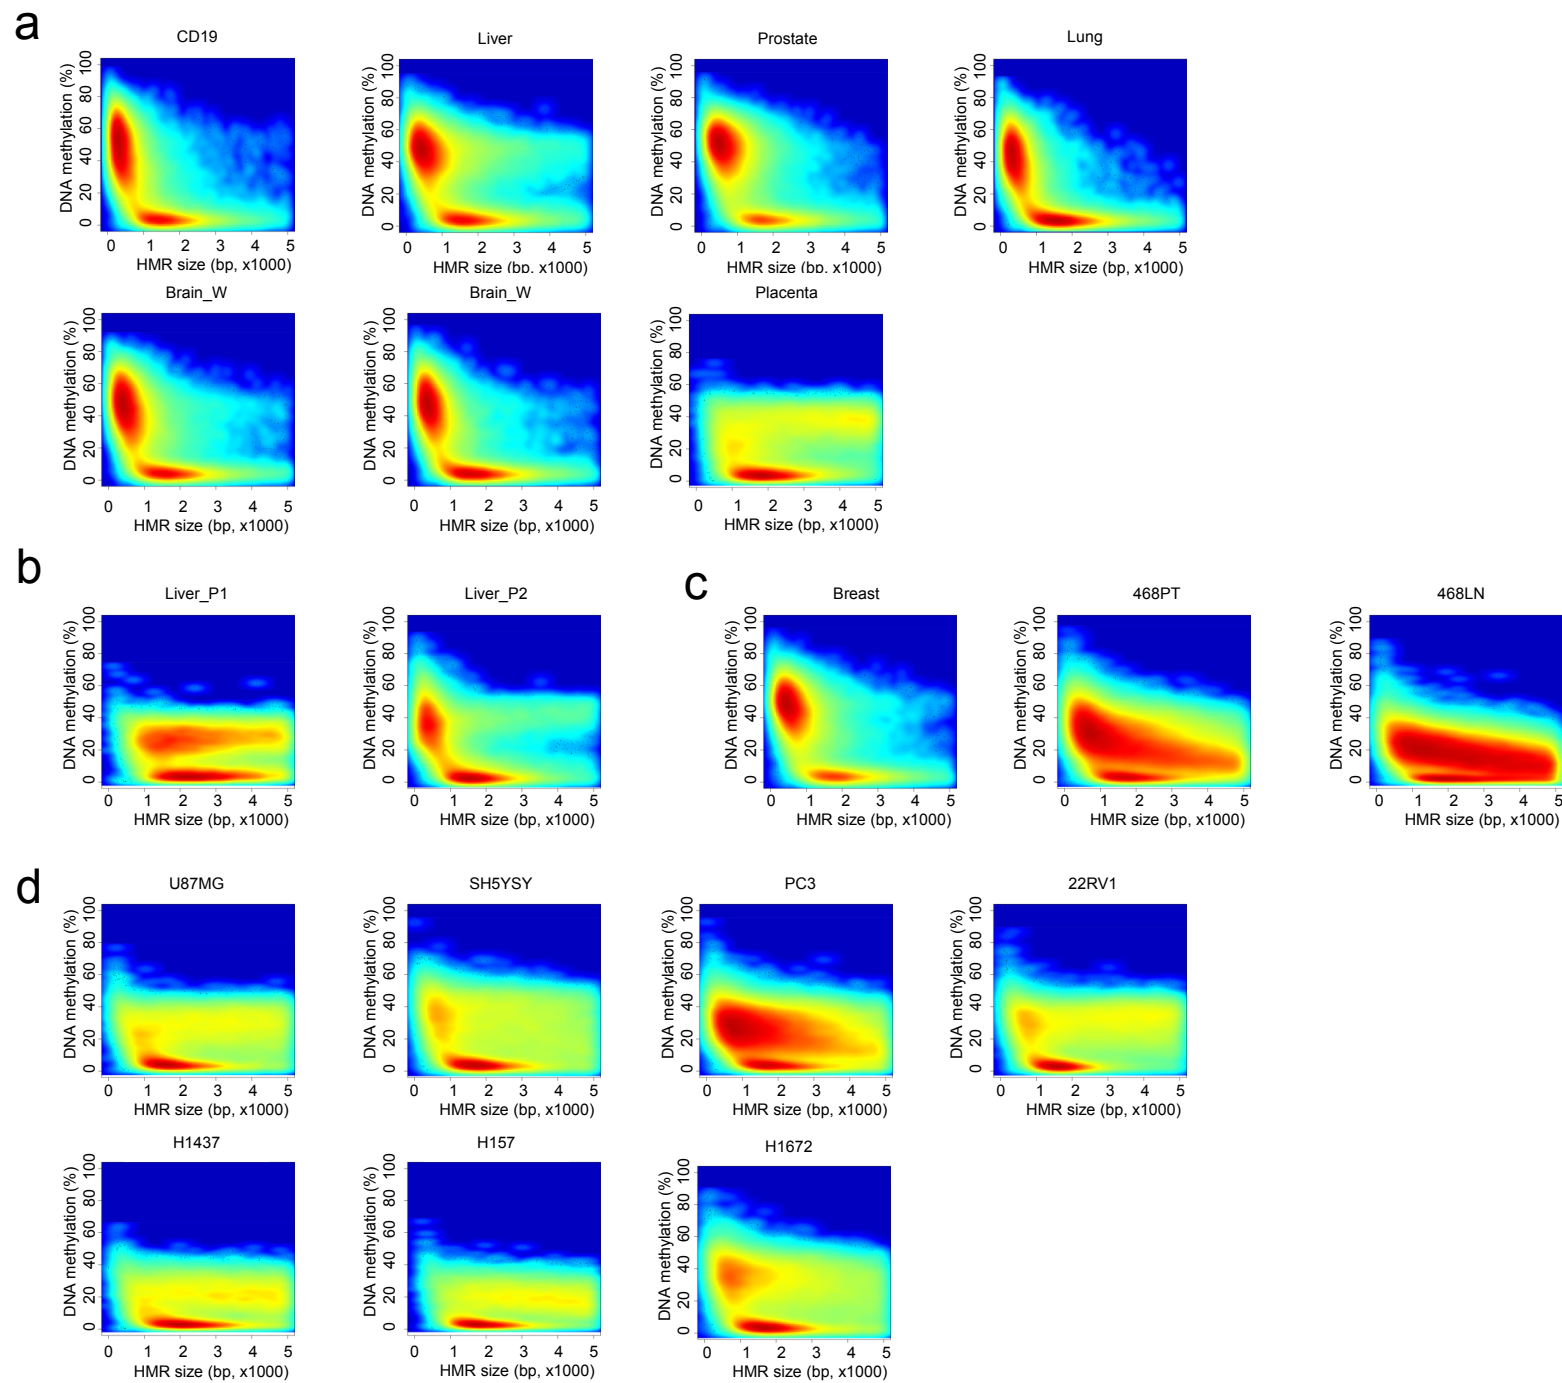

Figure S15

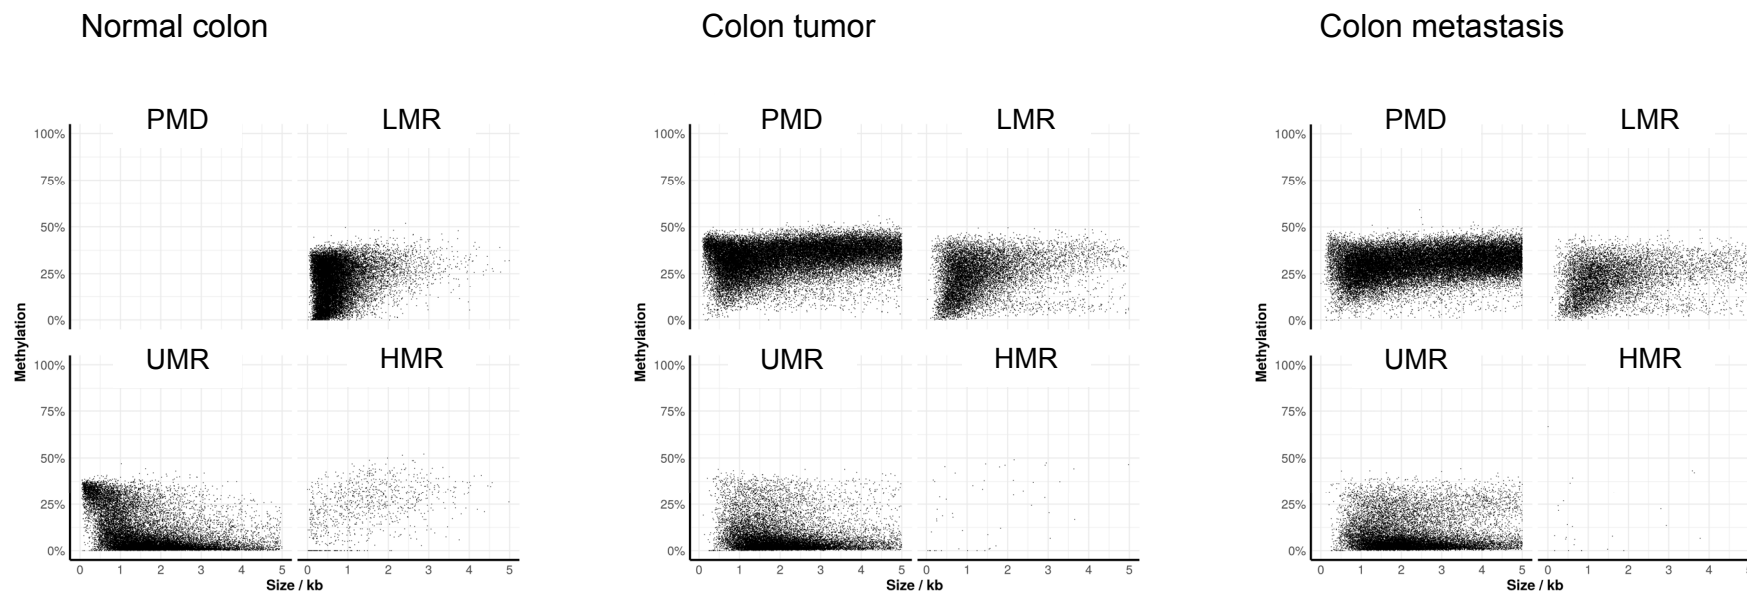

Figure S16

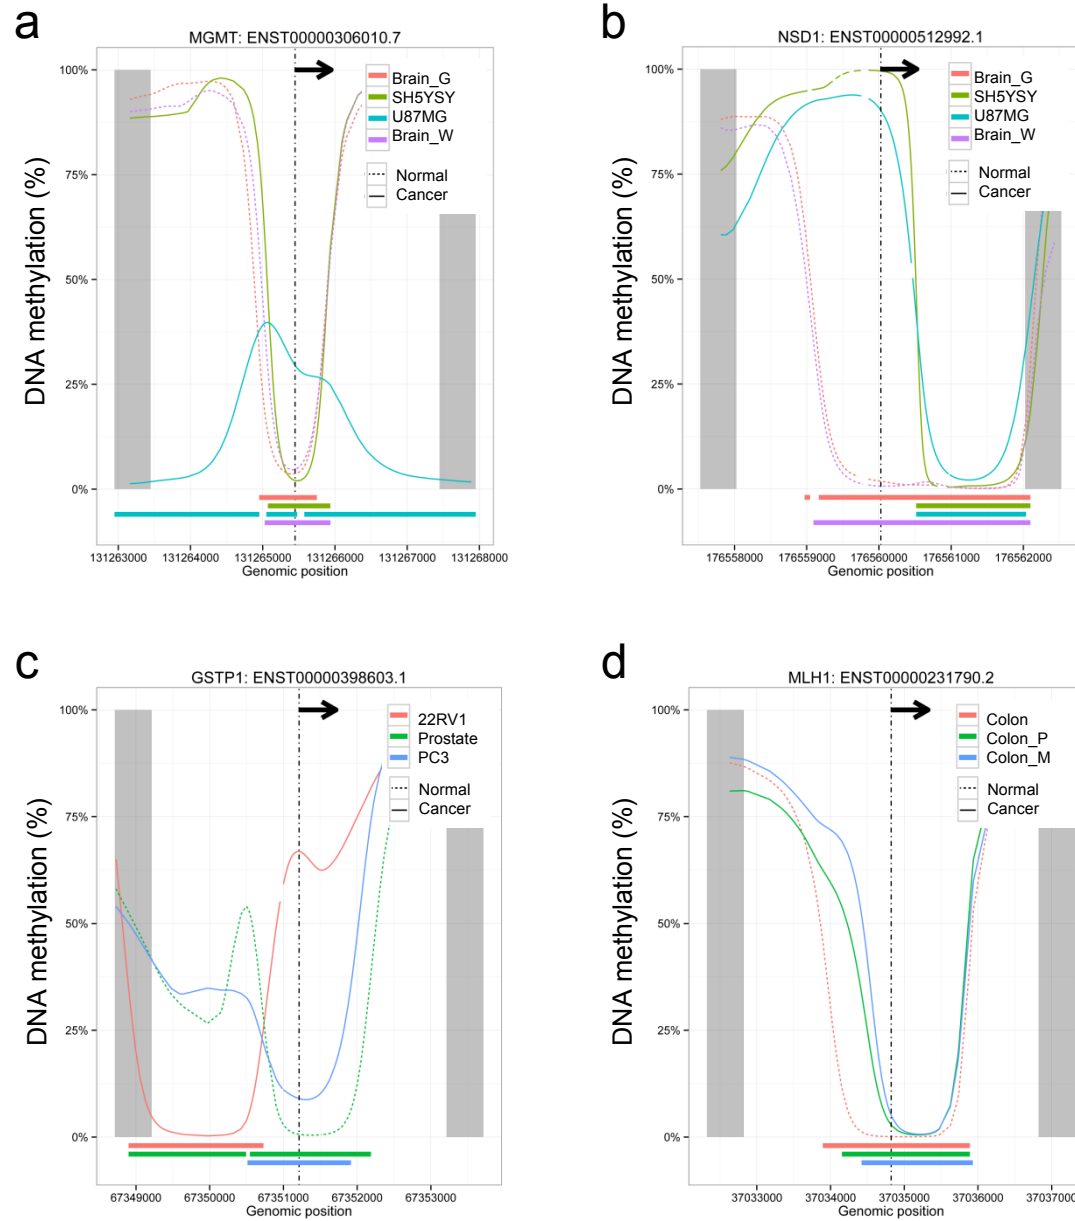

Figure S17

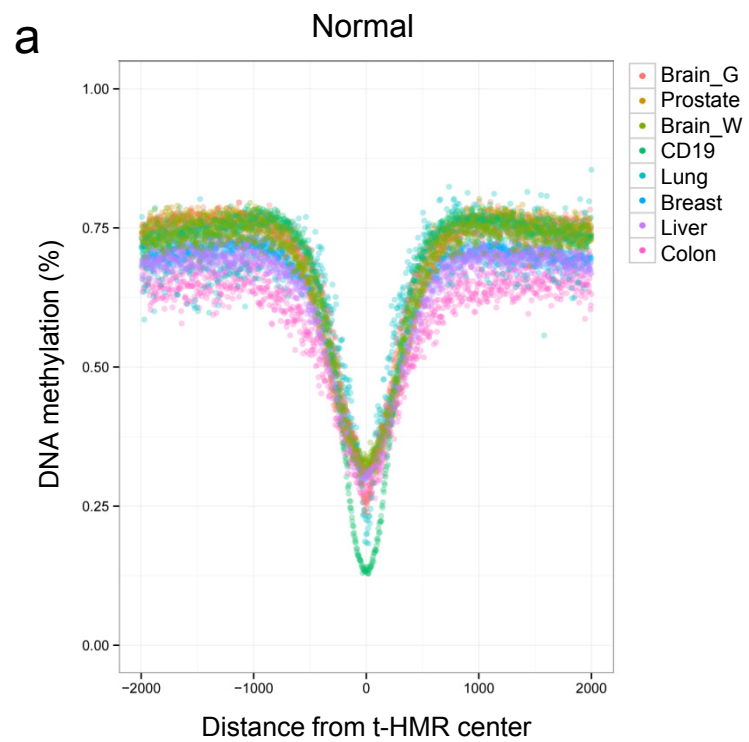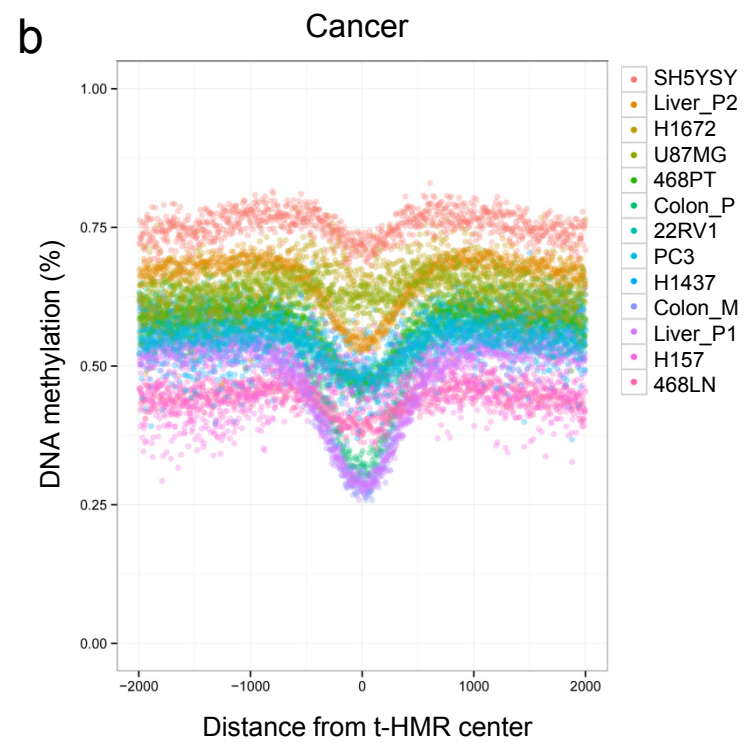

Table S1: Common, frequent and specific HMRs in normal human samples.

| <b>Tissue</b> | <b>Origin</b> | <b># HMRs</b> | <b>Genome-wide Coverage (bp)</b> | <b>Genome-wide Coverage (%)</b> | <b>AVR HMR Size (bp)</b> |
|---------------|---------------|---------------|----------------------------------|---------------------------------|--------------------------|
| CD19          | common        | 4515          | 6256437                          | 0,21%                           | 927                      |
| CD19          | frequent      | 9503          | 11261746                         | 0,37%                           | 765                      |
| CD19          | specific      | 14092         | 7917316                          | 0,26%                           | 436                      |
| Brain         | common        | 4209          | 6757362                          | 0,22%                           | 1107                     |
| Brain         | frequent      | 8562          | 11850842                         | 0,39%                           | 917                      |
| Brain         | specific      | 4932          | 2809802                          | 0,09%                           | 428                      |
| Breast        | common        | 4818          | 8262050                          | 0,27%                           | 1251                     |
| Breast        | frequent      | 11411         | 15889310                         | 0,52%                           | 993                      |
| Breast        | specific      | 9797          | 7152316                          | 0,24%                           | 572                      |
| Colon         | common        | 4265          | 6849339                          | 0,23%                           | 1171                     |
| Colon         | frequent      | 8617          | 12180402                         | 0,40%                           | 1010                     |
| Colon         | specific      | 3472          | 3814410                          | 0,13%                           | 823                      |
| Liver         | common        | 4650          | 8366788                          | 0,28%                           | 1213                     |
| Liver         | frequent      | 9924          | 15593961                         | 0,51%                           | 1051                     |
| Liver         | specific      | 10832         | 14123824                         | 0,47%                           | 914                      |
| Lung          | common        | 4223          | 6142345                          | 0,20%                           | 1008                     |
| Lung          | frequent      | 8342          | 10471696                         | 0,34%                           | 831                      |
| Lung          | specific      | 1226          | 609271                           | 0,02%                           | 352                      |
| Prostate      | common        | 4908          | 8481850                          | 0,28%                           | 1247                     |
| Prostate      | frequent      | 11840         | 16613772                         | 0,55%                           | 1007                     |
| Prostate      | specific      | 11655         | 9905193                          | 0,33%                           | 717                      |

**Table S2:** Top 100 most frequently hypermethylated HMRs in promoters throughout all cancer types.

| gene           | HMR ID       | # probes | Total | Frequencies | Hypermethylation events per cancer type |    |     |     |    |     |     |     |       |    |    |      |
|----------------|--------------|----------|-------|-------------|-----------------------------------------|----|-----|-----|----|-----|-----|-----|-------|----|----|------|
|                |              |          |       |             | ALL                                     | BC | CC  | CLL | GB | LAD | LC  | LSQ | LYMPH | NB | PC | SCLC |
| TBX15          | common_1730  | 26       | 820   | 0,74        | 28                                      | 53 | 102 | 14  | 27 | 225 | 193 | 90  | 12    | 0  | 21 | 55   |
| NPHS1          | common_26422 | 3        | 734   | 0,66        | 44                                      | 59 | 75  | 25  | 35 | 183 | 158 | 78  | 18    | 0  | 15 | 44   |
| PDE4DIP        | common_1766  | 2        | 723   | 0,65        | 35                                      | 38 | 73  | 8   | 15 | 208 | 203 | 69  | 18    | 0  | 20 | 36   |
| PRDM14         | common_12721 | 18       | 711   | 0,64        | 29                                      | 44 | 100 | 7   | 33 | 175 | 167 | 77  | 11    | 0  | 20 | 48   |
| BARHL2         | common_1496  | 29       | 668   | 0,60        | 28                                      | 45 | 97  | 22  | 34 | 156 | 125 | 77  | 17    | 0  | 16 | 51   |
| EVX2           | common_4365  | 32       | 650   | 0,58        | 35                                      | 44 | 80  | 26  | 24 | 173 | 99  | 83  | 15    | 0  | 19 | 52   |
| HOXA9          | common_10898 | 25       | 649   | 0,58        | 24                                      | 39 | 16  | 14  | 35 | 203 | 162 | 94  | 10    | 0  | 0  | 52   |
| ISL2           | common_21209 | 8        | 635   | 0,57        | 8                                       | 40 | 42  | 1   | 18 | 176 | 180 | 92  | 9     | 0  | 21 | 48   |
| OTP            | common_7939  | 14       | 632   | 0,57        | 21                                      | 44 | 73  | 17  | 28 | 193 | 120 | 55  | 17    | 0  | 20 | 44   |
| C2orf40        | common_3910  | 7        | 626   | 0,56        | 32                                      | 31 | 96  | 6   | 29 | 170 | 129 | 62  | 17    | 2  | 16 | 36   |
| ALX3           | common_1615  | 5        | 620   | 0,56        | 9                                       | 49 | 83  | 0   | 28 | 133 | 151 | 77  | 7     | 11 | 19 | 53   |
| SIM1           | common_10076 | 33       | 617   | 0,55        | 27                                      | 35 | 91  | 6   | 15 | 131 | 167 | 70  | 13    | 0  | 10 | 52   |
| DMRTA2         | common_1240  | 22       | 613   | 0,55        | 26                                      | 31 | 96  | 6   | 36 | 173 | 59  | 100 | 11    | 0  | 21 | 54   |
| CHFR           | common_19052 | 3        | 612   | 0,55        | 29                                      | 34 | 99  | 4   | 38 | 119 | 159 | 74  | 4     | 0  | 2  | 50   |
| FOXP1          | common_19748 | 29       | 609   | 0,55        | 43                                      | 37 | 97  | 25  | 0  | 173 | 117 | 65  | 8     | 0  | 18 | 26   |
| ZIC2           | common_19467 | 6        | 605   | 0,54        | 15                                      | 38 | 66  | 10  | 44 | 133 | 160 | 77  | 9     | 0  | 21 | 32   |
| ADAM32         | common_12529 | 7        | 604   | 0,54        | 43                                      | 22 | 29  | 16  | 40 | 123 | 205 | 55  | 17    | 5  | 10 | 39   |
| TBX20          | common_10990 | 34       | 598   | 0,54        | 34                                      | 44 | 100 | 8   | 28 | 161 | 63  | 66  | 15    | 18 | 10 | 51   |
| BOLL           | common_4491  | 8        | 597   | 0,54        | 38                                      | 39 | 99  | 5   | 34 | 107 | 162 | 72  | 6     | 0  | 5  | 30   |
| NKX2-3         | common_15449 | 14       | 594   | 0,53        | 33                                      | 43 | 99  | 11  | 13 | 149 | 70  | 86  | 15    | 0  | 22 | 53   |
| DRD4           | common_15983 | 8        | 591   | 0,53        | 17                                      | 24 | 95  | 3   | 12 | 130 | 191 | 76  | 9     | 0  | 6  | 28   |
| CYP26C1        | common_15355 | 6        | 589   | 0,53        | 20                                      | 31 | 71  | 2   | 21 | 120 | 162 | 73  | 12    | 5  | 23 | 49   |
| C9orf53;CDKN2A | common_13384 | 1        | 583   | 0,52        | 10                                      | 45 | 80  | 9   | 9  | 105 | 183 | 62  | 3     | 2  | 21 | 54   |
| GALR3          | common_29147 | 4        | 576   | 0,52        | 24                                      | 48 | 55  | 1   | 33 | 130 | 203 | 43  | 3     | 1  | 11 | 24   |
| THBS4          | common_7959  | 7        | 571   | 0,51        | 34                                      | 30 | 96  | 15  | 7  | 138 | 131 | 58  | 17    | 0  | 23 | 22   |
| RP11-542P2.1   | common_7267  | 4        | 569   | 0,51        | 32                                      | 40 | 34  | 3   | 42 | 180 | 84  | 65  | 13    | 1  | 25 | 50   |
| TRPM2          | common_28678 | 4        | 562   | 0,51        | 29                                      | 24 | 92  | 18  | 9  | 184 | 93  | 52  | 17    | 0  | 3  | 41   |
| GCM2           | common_9084  | 10       | 560   | 0,50        | 42                                      | 35 | 99  | 13  | 36 | 146 | 60  | 41  | 14    | 0  | 24 | 50   |
| WNT7B          | common_29379 | 6        | 555   | 0,50        | 8                                       | 27 | 73  | 0   | 0  | 245 | 29  | 97  | 5     | 0  | 21 | 50   |
| OTX2           | common_19916 | 15       | 554   | 0,50        | 40                                      | 30 | 97  | 12  | 19 | 140 | 45  | 90  | 14    | 0  | 14 | 53   |
| FOXE3          | common_1212  | 6        | 553   | 0,50        | 43                                      | 37 | 27  | 20  | 35 | 117 | 197 | 34  | 9     | 0  | 14 | 20   |
| ASIC3          | common_11945 | 3        | 542   | 0,49        | 26                                      | 24 | 59  | 23  | 27 | 113 | 204 | 13  | 11    | 9  | 11 | 22   |
| LYPD5          | common_26726 | 9        | 538   | 0,48        | 41                                      | 40 | 89  | 8   | 22 | 163 | 53  | 73  | 3     | 1  | 2  | 43   |
| LRR3           | common_26880 | 4        | 536   | 0,48        | 24                                      | 36 | 81  | 16  | 39 | 101 | 159 | 26  | 13    | 0  | 7  | 34   |
| CCDC8          | common_26861 | 5        | 534   | 0,48        | 26                                      | 47 | 100 | 9   | 27 | 121 | 89  | 44  | 14    | 17 | 18 | 22   |
| DLX6           | common_11414 | 24       | 529   | 0,48        | 32                                      | 37 | 70  | 9   | 22 | 118 | 146 | 53  | 8     | 2  | 21 | 11   |
| SIX1           | common_19956 | 4        | 525   | 0,47        | 21                                      | 36 | 66  | 12  | 21 | 152 | 76  | 87  | 6     | 0  | 25 | 23   |
| TCTEX1D1       | common_1385  | 12       | 524   | 0,47        | 8                                       | 49 | 96  | 1   | 2  | 113 | 142 | 32  | 11    | 0  | 24 | 46   |

|                 |              |    |     |      |    |    |     |    |    |     |     |    |    |    |    |    |
|-----------------|--------------|----|-----|------|----|----|-----|----|----|-----|-----|----|----|----|----|----|
| PRICKLE2        | common_5580  | 6  | 522 | 0,47 | 47 | 21 | 96  | 22 | 4  | 168 | 40  | 47 | 15 | 8  | 25 | 29 |
| KCNA7           | common_27020 | 6  | 521 | 0,47 | 40 | 25 | 70  | 22 | 31 | 108 | 163 | 22 | 15 | 0  | 0  | 25 |
| EFCAB1          | common_12592 | 9  | 516 | 0,46 | 44 | 22 | 99  | 24 | 25 | 100 | 152 | 18 | 17 | 0  | 5  | 10 |
| ZNF782          | common_13837 | 1  | 515 | 0,46 | 27 | 31 | 93  | 3  | 20 | 108 | 112 | 53 | 11 | 0  | 9  | 48 |
| OTX2            | common_19918 | 17 | 515 | 0,46 | 39 | 31 | 90  | 5  | 27 | 131 | 25  | 91 | 13 | 0  | 14 | 49 |
| SCGN            | common_9181  | 10 | 511 | 0,46 | 45 | 24 | 50  | 28 | 12 | 180 | 118 | 21 | 18 | 0  | 0  | 15 |
| FAM19A1         | common_5598  | 6  | 510 | 0,46 | 21 | 25 | 89  | 16 | 18 | 96  | 178 | 23 | 16 | 0  | 10 | 18 |
| HOPX            | common_6942  | 10 | 507 | 0,46 | 9  | 34 | 81  | 0  | 1  | 237 | 40  | 37 | 6  | 0  | 24 | 38 |
| OXT             | common_27507 | 3  | 505 | 0,45 | 15 | 40 | 50  | 0  | 35 | 105 | 149 | 52 | 2  | 3  | 22 | 32 |
| PAX6            | common_16321 | 19 | 504 | 0,45 | 22 | 23 | 94  | 3  | 41 | 98  | 70  | 76 | 9  | 0  | 16 | 52 |
| PRAC            | common_23940 | 10 | 503 | 0,45 | 23 | 40 | 25  | 11 | 19 | 165 | 73  | 81 | 11 | 0  | 1  | 54 |
| TAL1            | common_1209  | 19 | 497 | 0,45 | 12 | 43 | 31  | 1  | 16 | 124 | 148 | 44 | 7  | 0  | 21 | 50 |
| SLC13A3         | common_28033 | 4  | 497 | 0,45 | 36 | 25 | 93  | 15 | 19 | 160 | 44  | 41 | 12 | 0  | 25 | 27 |
| JPH4            | common_19694 | 2  | 496 | 0,45 | 22 | 43 | 93  | 5  | 25 | 97  | 83  | 63 | 15 | 2  | 9  | 39 |
| NKX2-4          | common_27659 | 14 | 496 | 0,45 | 21 | 28 | 90  | 7  | 21 | 98  | 146 | 46 | 8  | 0  | 9  | 22 |
| MAST1           | common_25864 | 8  | 493 | 0,44 | 6  | 39 | 37  | 0  | 17 | 66  | 213 | 33 | 13 | 19 | 18 | 32 |
| SOX1            | common_19551 | 48 | 492 | 0,44 | 37 | 34 | 94  | 17 | 18 | 127 | 53  | 54 | 14 | 0  | 15 | 29 |
| DMRTA2          | common_1241  | 32 | 490 | 0,44 | 26 | 30 | 59  | 13 | 3  | 108 | 119 | 61 | 8  | 0  | 19 | 44 |
| USP44           | common_18456 | 8  | 486 | 0,44 | 40 | 37 | 92  | 0  | 32 | 23  | 199 | 33 | 15 | 0  | 8  | 7  |
| ZSCAN30         | common_24874 | 5  | 485 | 0,44 | 9  | 14 | 53  | 4  | 5  | 113 | 205 | 52 | 9  | 2  | 8  | 11 |
| ZNF573          | common_26487 | 5  | 483 | 0,43 | 41 | 26 | 94  | 13 | 13 | 91  | 123 | 51 | 15 | 0  | 3  | 13 |
| MAG11           | common_5586  | 2  | 483 | 0,43 | 47 | 21 | 32  | 31 | 0  | 147 | 115 | 47 | 18 | 2  | 5  | 18 |
| VSX2            | common_20093 | 13 | 482 | 0,43 | 18 | 27 | 96  | 1  | 10 | 132 | 95  | 38 | 10 | 0  | 19 | 36 |
| WT1             | common_16333 | 3  | 479 | 0,43 | 13 | 44 | 88  | 16 | 4  | 155 | 36  | 64 | 14 | 0  | 21 | 24 |
| KIF19           | common_24295 | 8  | 479 | 0,43 | 10 | 37 | 75  | 10 | 18 | 122 | 111 | 48 | 8  | 1  | 20 | 19 |
| UCHL1           | common_6850  | 8  | 478 | 0,43 | 44 | 23 | 82  | 3  | 1  | 95  | 173 | 20 | 12 | 0  | 24 | 1  |
| TMC4            | common_27250 | 5  | 476 | 0,43 | 12 | 45 | 47  | 3  | 26 | 73  | 134 | 55 | 9  | 10 | 18 | 44 |
| CHD5            | common_216   | 3  | 475 | 0,43 | 38 | 29 | 9   | 34 | 33 | 96  | 167 | 20 | 10 | 12 | 1  | 26 |
| ZNF814          | common_27390 | 9  | 475 | 0,43 | 18 | 15 | 81  | 0  | 2  | 109 | 138 | 68 | 8  | 0  | 3  | 33 |
| MLNR            | common_19313 | 5  | 474 | 0,43 | 24 | 20 | 85  | 19 | 39 | 70  | 181 | 9  | 8  | 0  | 6  | 13 |
| RYR2            | common_2925  | 10 | 473 | 0,43 | 43 | 34 | 103 | 16 | 22 | 91  | 67  | 49 | 14 | 0  | 6  | 28 |
| KCNIP4          | common_6776  | 7  | 472 | 0,42 | 46 | 30 | 96  | 28 | 5  | 134 | 53  | 37 | 15 | 0  | 2  | 26 |
| TCF24           | common_12705 | 12 | 470 | 0,42 | 12 | 25 | 93  | 0  | 21 | 79  | 163 | 42 | 3  | 0  | 14 | 18 |
| B3GNT6          | common_17055 | 1  | 470 | 0,42 | 17 | 13 | 34  | 4  | 12 | 183 | 101 | 41 | 1  | 0  | 18 | 46 |
| HOXA9;RP1-170O1 | common_10900 | 31 | 469 | 0,42 | 18 | 24 | 4   | 10 | 24 | 155 | 154 | 32 | 11 | 0  | 0  | 37 |
| FBLL1           | common_8643  | 7  | 468 | 0,42 | 42 | 5  | 85  | 13 | 8  | 118 | 158 | 16 | 8  | 0  | 7  | 8  |
| ANKMY1;DUSP28   | common_4920  | 7  | 467 | 0,42 | 22 | 4  | 82  | 6  | 3  | 72  | 189 | 37 | 16 | 0  | 3  | 33 |
| TAC1            | common_11423 | 13 | 464 | 0,42 | 42 | 31 | 81  | 11 | 28 | 97  | 39  | 53 | 13 | 2  | 18 | 49 |
| SCRT1           | common_13210 | 4  | 464 | 0,42 | 31 | 28 | 70  | 10 | 22 | 108 | 143 | 25 | 13 | 5  | 0  | 9  |
| ACRBP           | common_17677 | 5  | 464 | 0,42 | 16 | 28 | 8   | 1  | 20 | 74  | 181 | 57 | 16 | 12 | 21 | 30 |
| ASPG            | common_20454 | 5  | 464 | 0,42 | 44 | 25 | 89  | 28 | 19 | 138 | 15  | 37 | 16 | 3  | 6  | 44 |
| IDUA            | common_6506  | 9  | 462 | 0,42 | 35 | 32 | 42  | 2  | 36 | 72  | 194 | 29 | 7  | 0  | 5  | 8  |
| KCNA6           | common_17638 | 7  | 461 | 0,41 | 24 | 32 | 94  | 0  | 0  | 163 | 83  | 40 | 10 | 0  | 5  | 10 |
| LHX1            | common_23557 | 9  | 460 | 0,41 | 13 | 24 | 88  | 4  | 14 | 124 | 54  | 65 | 11 | 3  | 9  | 51 |
| NKX6-2          | common_15897 | 45 | 458 | 0,41 | 38 | 20 | 64  | 6  | 7  | 85  | 193 | 19 | 12 | 0  | 0  | 14 |



|          |              |    |     |      |    |    |     |    |    |     |     |    |    |    |    |    |
|----------|--------------|----|-----|------|----|----|-----|----|----|-----|-----|----|----|----|----|----|
| VSX1     | common_27708 | 20 | 457 | 0,41 | 37 | 34 | 103 | 6  | 11 | 104 | 68  | 47 | 10 | 0  | 6  | 31 |
| PLAC9    | common_15257 | 6  | 455 | 0,41 | 32 | 45 | 69  | 23 | 12 | 89  | 68  | 59 | 17 | 0  | 21 | 20 |
| PRDM15   | common_28601 | 1  | 454 | 0,41 | 9  | 49 | 53  | 0  | 1  | 104 | 148 | 36 | 15 | 0  | 20 | 19 |
| AKR1E2   | common_14646 | 7  | 452 | 0,41 | 21 | 32 | 56  | 16 | 38 | 37  | 177 | 34 | 6  | 1  | 11 | 23 |
| EPS8L2   | common_15988 | 2  | 451 | 0,41 | 0  | 27 | 46  | 0  | 2  | 116 | 204 | 39 | 0  | 0  | 11 | 6  |
| VAX1     | common_15700 | 25 | 450 | 0,40 | 42 | 20 | 90  | 19 | 19 | 97  | 59  | 52 | 13 | 0  | 8  | 31 |
| C1orf114 | common_2289  | 9  | 448 | 0,40 | 24 | 49 | 96  | 1  | 0  | 83  | 77  | 64 | 2  | 0  | 24 | 28 |
| GBX2     | common_4853  | 7  | 447 | 0,40 | 30 | 29 | 42  | 7  | 35 | 95  | 84  | 64 | 13 | 1  | 20 | 27 |
| DNAJC6   | common_1375  | 11 | 446 | 0,40 | 16 | 34 | 65  | 1  | 0  | 160 | 81  | 28 | 16 | 0  | 24 | 21 |
| FAM181B  | common_17080 | 9  | 444 | 0,40 | 40 | 26 | 60  | 13 | 0  | 110 | 138 | 12 | 14 | 0  | 15 | 16 |
| C1QL3    | common_14748 | 7  | 442 | 0,40 | 22 | 17 | 87  | 0  | 10 | 98  | 183 | 13 | 2  | 0  | 1  | 9  |
| TJP1     | common_20618 | 6  | 440 | 0,40 | 45 | 24 | 67  | 31 | 1  | 130 | 67  | 29 | 18 | 0  | 10 | 18 |
| ZIC1     | common_6079  | 3  | 440 | 0,40 | 27 | 20 | 97  | 5  | 6  | 66  | 131 | 40 | 11 | 0  | 1  | 36 |
| PRDM13   | common_10059 | 25 | 439 | 0,39 | 40 | 31 | 80  | 21 | 18 | 103 | 20  | 54 | 13 | 0  | 11 | 48 |
| ZAR1     | common_6890  | 10 | 439 | 0,39 | 28 | 19 | 24  | 1  | 16 | 84  | 198 | 11 | 14 | 11 | 21 | 12 |
| KCNS2    | common_12868 | 7  | 438 | 0,39 | 40 | 9  | 59  | 11 | 12 | 102 | 180 | 7  | 14 | 0  | 0  | 4  |
| SORCS1   | common_15626 | 8  | 438 | 0,39 | 35 | 11 | 99  | 14 | 4  | 122 | 47  | 55 | 13 | 0  | 14 | 24 |

**Table S3:** Hypermethylated HMRs in promoters with a DNA methylation intensity >50%.

| gene        | HMR ID       | Nprobes | Intensity | Frequency | Hypermethylation events per cancer type |     |    |     |     |     |       |    |    |      |
|-------------|--------------|---------|-----------|-----------|-----------------------------------------|-----|----|-----|-----|-----|-------|----|----|------|
|             |              |         |           |           | BC                                      | CC  | GB | LAD | LC  | LSQ | LYMPH | NB | PC | SCLC |
| DCDC2       | common_9165  | 3       | 0,66      | 0,20      | 1                                       | 2   | 0  | 0   | 198 | 0   | 0     | 0  | 0  | 0    |
| CTSZ        | common_28216 | 9       | 0,63      | 0,06      | 0                                       | 1   | 17 | 3   | 1   | 2   | 0     | 17 | 0  | 17   |
| PISD        | common_29034 | 8       | 0,62      | 0,16      | 0                                       | 1   | 0  | 7   | 142 | 5   | 0     | 0  | 0  | 4    |
| ADHFE1      | common_12695 | 9       | 0,62      | 0,22      | 4                                       | 103 | 1  | 52  | 1   | 21  | 11    | 0  | 3  | 23   |
| IQSEC1      | common_5080  | 11      | 0,62      | 0,05      | 1                                       | 0   | 8  | 0   | 0   | 3   | 8     | 1  | 0  | 31   |
| CDKN2A      | common_13386 | 2       | 0,60      | 0,27      | 4                                       | 50  | 0  | 22  | 160 | 30  | 3     | 0  | 2  | 1    |
| ERGIC1      | common_8693  | 4       | 0,59      | 0,01      | 2                                       | 0   | 2  | 2   | 3   | 1   | 0     | 0  | 0  | 1    |
| BCAT2       | common_27005 | 3       | 0,59      | 0,02      | 0                                       | 0   | 9  | 2   | 0   | 1   | 2     | 0  | 7  | 0    |
| TRIM13      | common_19324 | 7       | 0,59      | 0,05      | 0                                       | 0   | 0  | 0   | 46  | 0   | 0     | 0  | 0  | 2    |
| GNMT        | common_9758  | 26      | 0,58      | 0,03      | 0                                       | 0   | 7  | 2   | 0   | 0   | 16    | 0  | 0  | 3    |
| DCDC2;KAAG1 | common_9164  | 9       | 0,58      | 0,33      | 7                                       | 17  | 44 | 18  | 176 | 30  | 7     | 12 | 3  | 22   |
| SNED1       | common_4937  | 10      | 0,57      | 0,01      | 0                                       | 0   | 8  | 0   | 0   | 0   | 6     | 0  | 0  | 1    |
| SNX31       | common_12887 | 8       | 0,57      | 0,28      | 12                                      | 12  | 6  | 35  | 194 | 8   | 13    | 0  | 3  | 4    |
| SRF         | common_9768  | 4       | 0,57      | 0,17      | 8                                       | 0   | 0  | 7   | 143 | 7   | 1     | 0  | 0  | 3    |
| GPER        | common_10602 | 4       | 0,57      | 0,06      | 0                                       | 18  | 6  | 3   | 1   | 5   | 0     | 0  | 0  | 27   |
| SH3BGRL3    | common_697   | 7       | 0,57      | 0,03      | 0                                       | 0   | 0  | 0   | 30  | 0   | 0     | 0  | 0  | 1    |
| UNKL        | common_21660 | 3       | 0,56      | 0,18      | 0                                       | 0   | 1  | 6   | 171 | 2   | 0     | 0  | 0  | 1    |
| GRHL2       | common_12906 | 4       | 0,56      | 0,26      | 0                                       | 1   | 43 | 1   | 196 | 0   | 10    | 4  | 1  | 4    |
| DDAH2       | common_9505  | 36      | 0,56      | 0,01      | 0                                       | 0   | 0  | 1   | 0   | 5   | 1     | 0  | 0  | 5    |
| ARTN        | common_1124  | 2       | 0,56      | 0,06      | 6                                       | 3   | 6  | 2   | 6   | 0   | 17    | 13 | 0  | 5    |
| FAM149A     | common_7490  | 12      | 0,56      | 0,01      | 2                                       | 3   | 0  | 4   | 0   | 0   | 4     | 0  | 0  | 2    |
| IGDCC3      | common_21015 | 6       | 0,56      | 0,04      | 0                                       | 34  | 0  | 5   | 0   | 0   | 5     | 0  | 0  | 0    |
| NCOA4       | common_15020 | 9       | 0,56      | 0,06      | 5                                       | 3   | 3  | 2   | 0   | 8   | 15    | 0  | 12 | 10   |
| ZNF788      | common_25823 | 6       | 0,56      | 0,32      | 1                                       | 84  | 3  | 26  | 145 | 28  | 6     | 11 | 4  | 16   |
| EDEM2       | common_27820 | 6       | 0,56      | 0,11      | 3                                       | 7   | 0  | 6   | 79  | 14  | 0     | 0  | 0  | 1    |
| SEPT9       | common_24422 | 13      | 0,56      | 0,30      | 2                                       | 71  | 0  | 19  | 173 | 24  | 0     | 0  | 14 | 1    |
| ARAP3       | common_8433  | 8       | 0,56      | 0,03      | 1                                       | 0   | 10 | 1   | 3   | 0   | 7     | 8  | 0  | 3    |
| AMPH        | common_11011 | 8       | 0,56      | 0,17      | 1                                       | 99  | 1  | 35  | 26  | 2   | 6     | 0  | 3  | 0    |

|           |              |    |      |      |    |    |    |     |     |    |    |    |    |    |
|-----------|--------------|----|------|------|----|----|----|-----|-----|----|----|----|----|----|
| FAM109B   | common_29283 | 3  | 0,56 | 0,26 | 2  | 2  | 12 | 11  | 196 | 15 | 4  | 7  | 0  | 16 |
| DCLK1     | common_19232 | 8  | 0,55 | 0,14 | 0  | 96 | 0  | 5   | 23  | 0  | 14 | 0  | 0  | 0  |
| AS3MT     | common_15582 | 8  | 0,55 | 0,05 | 4  | 25 | 0  | 3   | 2   | 2  | 12 | 0  | 0  | 2  |
| FIGN      | common_4253  | 10 | 0,55 | 0,12 | 3  | 95 | 0  | 8   | 0   | 0  | 17 | 0  | 0  | 2  |
| BCAT2     | common_27004 | 3  | 0,55 | 0,03 | 0  | 0  | 0  | 0   | 27  | 0  | 0  | 0  | 0  | 0  |
| THEM4     | common_1942  | 8  | 0,55 | 0,04 | 2  | 1  | 11 | 1   | 0   | 15 | 0  | 0  | 0  | 13 |
| TJP3      | common_25468 | 3  | 0,55 | 0,13 | 0  | 0  | 0  | 1   | 132 | 0  | 0  | 0  | 0  | 0  |
| USP44     | common_18456 | 8  | 0,55 | 0,44 | 37 | 92 | 32 | 23  | 199 | 33 | 15 | 0  | 8  | 7  |
| FDFT1     | common_12233 | 5  | 0,55 | 0,02 | 0  | 1  | 0  | 0   | 0   | 4  | 14 | 0  | 0  | 1  |
| C8orf42   | common_12104 | 6  | 0,55 | 0,13 | 3  | 89 | 4  | 4   | 9   | 3  | 14 | 0  | 0  | 6  |
| ZSCAN30   | common_24874 | 5  | 0,55 | 0,47 | 14 | 53 | 5  | 113 | 205 | 52 | 9  | 2  | 8  | 11 |
| TRAF3IP2  | common_10157 | 8  | 0,54 | 0,04 | 0  | 0  | 6  | 0   | 9   | 0  | 2  | 19 | 0  | 8  |
| ANO5      | common_16287 | 10 | 0,54 | 0,10 | 3  | 71 | 0  | 10  | 2   | 3  | 11 | 0  | 1  | 0  |
| PPFIA3    | common_27026 | 5  | 0,54 | 0,32 | 18 | 57 | 0  | 30  | 139 | 56 | 10 | 0  | 0  | 11 |
| C20orf194 | common_27518 | 13 | 0,54 | 0,05 | 0  | 44 | 0  | 1   | 7   | 0  | 0  | 0  | 0  | 0  |
| TPST1     | common_11195 | 11 | 0,54 | 0,01 | 0  | 12 | 0  | 0   | 0   | 0  | 0  | 0  | 0  | 0  |
| ACSL6     | common_8162  | 9  | 0,54 | 0,05 | 0  | 24 | 0  | 5   | 10  | 0  | 8  | 0  | 0  | 1  |
| HFE       | common_9189  | 4  | 0,54 | 0,09 | 11 | 0  | 6  | 9   | 2   | 3  | 7  | 19 | 17 | 21 |
| RASL11B   | common_6907  | 4  | 0,54 | 0,26 | 0  | 22 | 13 | 28  | 192 | 4  | 1  | 0  | 0  | 1  |
| MYO15A    | common_23284 | 3  | 0,54 | 0,19 | 2  | 3  | 7  | 4   | 135 | 15 | 12 | 0  | 15 | 3  |
| C8orf86   | common_12517 | 3  | 0,54 | 0,01 | 0  | 1  | 0  | 0   | 0   | 2  | 3  | 0  | 0  | 5  |
| GPR126    | common_10329 | 7  | 0,54 | 0,02 | 5  | 0  | 4  | 1   | 0   | 0  | 10 | 0  | 0  | 1  |
| SUOX      | common_18209 | 11 | 0,54 | 0,02 | 0  | 0  | 0  | 0   | 0   | 1  | 15 | 0  | 0  | 0  |
| ZNF790    | common_26463 | 14 | 0,54 | 0,06 | 0  | 48 | 0  | 5   | 0   | 5  | 1  | 0  | 0  | 0  |
| TTC12     | common_17234 | 11 | 0,54 | 0,03 | 0  | 0  | 14 | 0   | 0   | 3  | 3  | 0  | 0  | 6  |
| ZNF783    | common_11896 | 5  | 0,54 | 0,22 | 6  | 2  | 0  | 6   | 199 | 10 | 3  | 0  | 0  | 0  |
| EVL       | common_20349 | 9  | 0,54 | 0,11 | 1  | 90 | 0  | 4   | 13  | 0  | 0  | 0  | 0  | 1  |
| EVC2;EVC  | common_6632  | 11 | 0,54 | 0,11 | 1  | 90 | 2  | 2   | 12  | 0  | 3  | 0  | 0  | 4  |
| C1orf216  | common_931   | 6  | 0,53 | 0,01 | 0  | 4  | 1  | 0   | 0   | 0  | 0  | 0  | 0  | 6  |
| STAT5A    | common_23713 | 2  | 0,53 | 0,02 | 0  | 0  | 5  | 4   | 0   | 2  | 0  | 0  | 1  | 5  |
| RASGRF1   | common_21257 | 22 | 0,53 | 0,12 | 4  | 85 | 1  | 7   | 17  | 0  | 1  | 0  | 0  | 3  |
| ZNF793    | common_26480 | 13 | 0,53 | 0,12 | 1  | 85 | 0  | 14  | 19  | 4  | 1  | 0  | 0  | 2  |
| ERBB2     | common_23634 | 10 | 0,53 | 0,06 | 0  | 1  | 8  | 0   | 8   | 1  | 16 | 4  | 0  | 27 |

|          |              |    |      |      |    |    |    |     |     |    |    |    |    |    |
|----------|--------------|----|------|------|----|----|----|-----|-----|----|----|----|----|----|
| EIF4EBP3 | common_8320  | 12 | 0,53 | 0,03 | 0  | 0  | 0  | 9   | 0   | 7  | 12 | 0  | 0  | 6  |
| MYO15A   | common_23285 | 2  | 0,53 | 0,05 | 0  | 0  | 7  | 2   | 18  | 1  | 0  | 12 | 0  | 9  |
| CCDC149  | common_6786  | 4  | 0,53 | 0,02 | 0  | 2  | 0  | 0   | 6   | 0  | 13 | 0  | 0  | 2  |
| MR1      | common_2376  | 3  | 0,53 | 0,06 | 0  | 9  | 5  | 2   | 3   | 3  | 0  | 12 | 0  | 24 |
| MSMP     | common_13481 | 2  | 0,53 | 0,04 | 1  | 0  | 0  | 2   | 0   | 28 | 0  | 0  | 5  | 0  |
| SLC16A12 | common_15323 | 14 | 0,53 | 0,19 | 13 | 94 | 8  | 26  | 13  | 5  | 12 | 0  | 12 | 4  |
| ECHDC2   | common_1270  | 4  | 0,53 | 0,02 | 0  | 1  | 8  | 2   | 0   | 2  | 0  | 0  | 0  | 3  |
| CCNJ     | common_15384 | 14 | 0,53 | 0,16 | 0  | 0  | 0  | 0   | 159 | 4  | 0  | 0  | 0  | 0  |
| MARCH2   | common_2720  | 14 | 0,53 | 0,03 | 0  | 1  | 5  | 3   | 0   | 6  | 16 | 0  | 0  | 4  |
| CELF6    | common_21109 | 9  | 0,53 | 0,19 | 0  | 8  | 0  | 2   | 180 | 0  | 0  | 0  | 1  | 0  |
| RBMS1    | common_4232  | 6  | 0,53 | 0,18 | 0  | 42 | 1  | 0   | 134 | 0  | 0  | 0  | 2  | 1  |
| SYNM     | common_21510 | 11 | 0,53 | 0,18 | 3  | 19 | 11 | 15  | 119 | 2  | 8  | 0  | 0  | 0  |
| GREB1L   | common_24799 | 14 | 0,53 | 0,13 | 0  | 77 | 24 | 8   | 0   | 5  | 12 | 0  | 0  | 1  |
| CRYM     | common_21980 | 3  | 0,53 | 0,38 | 36 | 32 | 34 | 40  | 169 | 27 | 16 | 0  | 7  | 20 |
| BHLHA15  | common_11432 | 3  | 0,53 | 0,24 | 9  | 9  | 8  | 6   | 171 | 8  | 14 | 0  | 15 | 2  |
| FAM20A   | common_24246 | 6  | 0,53 | 0,09 | 10 | 66 | 5  | 0   | 0   | 0  | 5  | 0  | 1  | 1  |
| DIXDC1   | common_17223 | 8  | 0,53 | 0,10 | 0  | 10 | 0  | 24  | 46  | 2  | 13 | 0  | 0  | 4  |
| PTPRG    | common_5558  | 17 | 0,53 | 0,01 | 1  | 2  | 0  | 3   | 0   | 0  | 5  | 0  | 0  | 0  |
| SPATA32  | common_23838 | 11 | 0,53 | 0,36 | 4  | 90 | 0  | 47  | 142 | 39 | 7  | 0  | 2  | 34 |
| ZNF148   | common_5844  | 5  | 0,53 | 0,35 | 11 | 90 | 4  | 22  | 169 | 22 | 14 | 0  | 0  | 25 |
| VEPH1    | common_6145  | 11 | 0,53 | 0,05 | 0  | 0  | 12 | 1   | 0   | 0  | 7  | 13 | 0  | 17 |
| NPAS2    | common_3867  | 12 | 0,53 | 0,01 | 0  | 0  | 0  | 1   | 0   | 0  | 5  | 0  | 0  | 5  |
| STOM     | common_14040 | 3  | 0,53 | 0,09 | 0  | 69 | 0  | 3   | 0   | 10 | 0  | 0  | 0  | 9  |
| FAM65A   | common_22454 | 5  | 0,53 | 0,10 | 1  | 21 | 2  | 5   | 66  | 5  | 0  | 0  | 1  | 4  |
| CLHC1    | common_3443  | 4  | 0,53 | 0,09 | 0  | 9  | 27 | 20  | 12  | 9  | 0  | 0  | 6  | 11 |
| NRG1     | common_12473 | 10 | 0,53 | 0,10 | 2  | 80 | 0  | 8   | 1   | 0  | 5  | 0  | 3  | 2  |
| TMEM88B  | common_65    | 2  | 0,52 | 0,04 | 0  | 22 | 0  | 8   | 9   | 1  | 4  | 0  | 0  | 1  |
| FAM126A  | common_10841 | 13 | 0,52 | 0,03 | 7  | 18 | 0  | 1   | 0   | 0  | 0  | 0  | 0  | 1  |
| CHST1    | common_16425 | 10 | 0,52 | 0,04 | 0  | 33 | 0  | 5   | 0   | 0  | 1  | 0  | 0  | 0  |
| OXT      | common_27507 | 3  | 0,52 | 0,49 | 40 | 50 | 35 | 105 | 149 | 52 | 2  | 3  | 22 | 32 |
| ZNF264   | common_27359 | 14 | 0,52 | 0,05 | 1  | 46 | 0  | 1   | 2   | 3  | 0  | 0  | 0  | 0  |
| KCNK5    | common_9693  | 9  | 0,52 | 0,03 | 5  | 0  | 12 | 0   | 3   | 1  | 0  | 0  | 0  | 5  |
| PHF19    | common_14028 | 4  | 0,52 | 0,15 | 0  | 0  | 41 | 2   | 69  | 7  | 0  | 2  | 0  | 27 |

|               |              |    |      |      |    |    |    |     |     |    |    |    |    |    |
|---------------|--------------|----|------|------|----|----|----|-----|-----|----|----|----|----|----|
| DRD4          | common_15983 | 8  | 0,52 | 0,57 | 24 | 95 | 12 | 130 | 191 | 76 | 9  | 0  | 6  | 28 |
| MPZ           | common_2193  | 2  | 0,52 | 0,31 | 46 | 51 | 1  | 39  | 140 | 20 | 5  | 0  | 7  | 6  |
| FBXO10        | common_13518 | 2  | 0,52 | 0,07 | 1  | 44 | 0  | 9   | 2   | 5  | 7  | 0  | 0  | 2  |
| LRRFIP1       | common_4873  | 11 | 0,52 | 0,10 | 0  | 76 | 1  | 12  | 0   | 2  | 5  | 0  | 0  | 0  |
| EPM2AIP1;MLH1 | common_5214  | 39 | 0,52 | 0,02 | 0  | 16 | 0  | 0   | 0   | 1  | 0  | 0  | 0  | 2  |
| EPB49         | common_12311 | 2  | 0,52 | 0,02 | 0  | 1  | 10 | 2   | 2   | 0  | 0  | 3  | 0  | 3  |
| APBB1         | common_16121 | 19 | 0,52 | 0,02 | 0  | 10 | 0  | 1   | 9   | 0  | 0  | 0  | 0  | 0  |
| AQP5          | common_18003 | 4  | 0,52 | 0,40 | 16 | 93 | 29 | 50  | 165 | 8  | 8  | 1  | 25 | 6  |
| FNBP1         | common_14287 | 8  | 0,52 | 0,01 | 0  | 15 | 0  | 0   | 0   | 0  | 0  | 0  | 0  | 0  |
| MYO5C         | common_20893 | 8  | 0,52 | 0,02 | 0  | 0  | 0  | 0   | 1   | 1  | 12 | 0  | 0  | 2  |
| TNFAIP8       | common_8114  | 8  | 0,52 | 0,10 | 6  | 29 | 1  | 18  | 2   | 13 | 2  | 0  | 5  | 23 |
| ANKEF1        | common_27593 | 9  | 0,52 | 0,01 | 0  | 1  | 7  | 0   | 0   | 0  | 6  | 0  | 0  | 0  |
| LONRF2        | common_3863  | 7  | 0,52 | 0,12 | 1  | 99 | 0  | 2   | 11  | 1  | 2  | 0  | 0  | 1  |
| DAB1          | common_1316  | 15 | 0,52 | 0,15 | 2  | 95 | 0  | 27  | 11  | 0  | 12 | 0  | 0  | 2  |
| RUNDC3B       | common_11362 | 11 | 0,52 | 0,06 | 0  | 12 | 23 | 9   | 0   | 3  | 7  | 0  | 0  | 4  |
| H2AFJ         | common_17790 | 15 | 0,52 | 0,06 | 0  | 10 | 12 | 5   | 4   | 12 | 0  | 0  | 0  | 20 |
| SH3RF2        | common_8469  | 8  | 0,52 | 0,04 | 1  | 1  | 2  | 0   | 1   | 0  | 1  | 12 | 0  | 23 |
| C1QL1         | common_23820 | 4  | 0,52 | 0,36 | 7  | 72 | 0  | 56  | 193 | 9  | 2  | 3  | 11 | 6  |
| CYP26B1       | common_3609  | 2  | 0,52 | 0,23 | 30 | 4  | 13 | 25  | 111 | 29 | 4  | 1  | 7  | 11 |
| SLC2A2        | common_6207  | 5  | 0,52 | 0,21 | 46 | 15 | 13 | 53  | 6   | 35 | 0  | 2  | 21 | 24 |
| C9orf3        | common_13811 | 3  | 0,52 | 0,01 | 0  | 0  | 5  | 0   | 5   | 0  | 2  | 1  | 0  | 1  |
| SASH1         | common_10361 | 14 | 0,52 | 0,01 | 1  | 1  | 0  | 0   | 0   | 0  | 8  | 0  | 0  | 3  |
| ANKRD6        | common_10020 | 5  | 0,52 | 0,04 | 0  | 34 | 0  | 0   | 0   | 1  | 2  | 0  | 0  | 0  |
| SCNN1A        | common_17663 | 3  | 0,52 | 0,02 | 0  | 1  | 4  | 1   | 0   | 0  | 2  | 0  | 0  | 11 |
| ANKRD28       | common_5130  | 2  | 0,52 | 0,09 | 1  | 12 | 0  | 0   | 30  | 1  | 0  | 4  | 5  | 35 |
| ALS2CL        | common_5329  | 9  | 0,52 | 0,02 | 0  | 1  | 5  | 0   | 1   | 1  | 2  | 0  | 0  | 13 |
| NAV2          | common_16275 | 5  | 0,52 | 0,02 | 0  | 1  | 8  | 0   | 2   | 1  | 2  | 1  | 0  | 2  |
| RNF180        | common_7833  | 7  | 0,52 | 0,13 | 9  | 63 | 0  | 31  | 8   | 2  | 17 | 0  | 0  | 5  |
| DNAH11        | common_10825 | 9  | 0,52 | 0,11 | 3  | 85 | 0  | 4   | 3   | 0  | 12 | 0  | 0  | 1  |
| METTL24       | common_10147 | 6  | 0,52 | 0,32 | 16 | 90 | 17 | 40  | 113 | 15 | 16 | 0  | 5  | 7  |
| PDZD2         | common_7677  | 6  | 0,52 | 0,09 | 0  | 68 | 2  | 1   | 8   | 0  | 11 | 0  | 2  | 1  |
| SMTN          | common_29025 | 4  | 0,52 | 0,22 | 10 | 42 | 4  | 44  | 74  | 7  | 0  | 2  | 12 | 27 |
| THRB          | common_5159  | 26 | 0,52 | 0,04 | 1  | 3  | 6  | 8   | 0   | 0  | 17 | 0  | 0  | 6  |

|                    |              |    |      |      |    |    |    |     |     |    |    |   |    |    |
|--------------------|--------------|----|------|------|----|----|----|-----|-----|----|----|---|----|----|
| PPAP2B;PRKAA2      | common_1314  | 15 | 0,52 | 0,09 | 0  | 33 | 0  | 5   | 30  | 0  | 17 | 0 | 0  | 1  |
| OSBPL1A            | common_24830 | 7  | 0,52 | 0,02 | 0  | 3  | 0  | 0   | 0   | 0  | 13 | 0 | 0  | 9  |
| UGGT2              | common_19432 | 12 | 0,52 | 0,01 | 0  | 0  | 0  | 0   | 0   | 1  | 13 | 0 | 0  | 1  |
| CYGB;PRCD          | common_24398 | 10 | 0,52 | 0,22 | 9  | 31 | 0  | 32  | 130 | 9  | 8  | 0 | 0  | 4  |
| ENTPD3             | common_5252  | 7  | 0,52 | 0,25 | 4  | 29 | 25 | 3   | 175 | 0  | 9  | 2 | 1  | 4  |
| AGBL2              | common_16475 | 6  | 0,51 | 0,01 | 0  | 2  | 2  | 3   | 0   | 1  | 0  | 2 | 0  | 3  |
| CLUAP1             | common_21786 | 13 | 0,51 | 0,02 | 0  | 1  | 0  | 2   | 0   | 22 | 0  | 0 | 0  | 0  |
| IQCJ-SCHIP1        | common_6160  | 2  | 0,51 | 0,08 | 2  | 2  | 12 | 18  | 0   | 3  | 3  | 4 | 0  | 32 |
| EFNB2              | common_19496 | 10 | 0,51 | 0,18 | 0  | 1  | 3  | 2   | 177 | 1  | 1  | 0 | 0  | 0  |
| STAT6              | common_18249 | 2  | 0,51 | 0,04 | 1  | 0  | 23 | 0   | 2   | 1  | 0  | 6 | 1  | 8  |
| PHLDB1             | common_17303 | 8  | 0,51 | 0,01 | 0  | 1  | 5  | 0   | 2   | 0  | 0  | 3 | 0  | 3  |
| C3orf80            | common_6165  | 13 | 0,51 | 0,03 | 0  | 16 | 0  | 1   | 11  | 0  | 0  | 0 | 0  | 0  |
| CYP1B1             | common_3318  | 27 | 0,51 | 0,02 | 0  | 3  | 2  | 2   | 0   | 2  | 2  | 0 | 0  | 5  |
| EHD1               | common_16713 | 3  | 0,51 | 0,03 | 4  | 1  | 6  | 8   | 0   | 3  | 0  | 0 | 0  | 9  |
| CPAMD8             | common_26041 | 8  | 0,51 | 0,10 | 10 | 62 | 4  | 6   | 7   | 0  | 4  | 0 | 0  | 4  |
| SH3GL3             | common_21312 | 11 | 0,51 | 0,13 | 1  | 78 | 7  | 24  | 13  | 1  | 3  | 0 | 0  | 6  |
| FOXE3              | common_1212  | 6  | 0,51 | 0,49 | 37 | 27 | 35 | 117 | 197 | 34 | 9  | 0 | 14 | 20 |
| CAST               | common_8044  | 12 | 0,51 | 0,05 | 3  | 1  | 0  | 15  | 0   | 5  | 15 | 0 | 6  | 4  |
| TM9SF1;CHMP4A;MDP1 | common_19715 | 6  | 0,51 | 0,10 | 3  | 0  | 0  | 1   | 94  | 0  | 0  | 0 | 3  | 0  |
| WWTR1              | common_6093  | 17 | 0,51 | 0,01 | 0  | 7  | 5  | 0   | 0   | 0  | 0  | 0 | 0  | 3  |
| RBP1               | common_6020  | 12 | 0,51 | 0,22 | 3  | 85 | 7  | 11  | 84  | 4  | 8  | 0 | 20 | 0  |
| SLC34A2            | common_6794  | 7  | 0,51 | 0,19 | 17 | 23 | 38 | 4   | 40  | 30 | 15 | 0 | 18 | 8  |
| RARRES1;MFSD1      | common_6156  | 6  | 0,51 | 0,07 | 2  | 2  | 4  | 6   | 6   | 17 | 9  | 1 | 14 | 11 |
| DOCK1              | common_15824 | 8  | 0,51 | 0,02 | 0  | 1  | 0  | 2   | 2   | 3  | 7  | 0 | 0  | 2  |
| ABCA3              | common_21707 | 5  | 0,51 | 0,01 | 0  | 0  | 0  | 0   | 12  | 0  | 0  | 0 | 0  | 0  |
| REGG               | common_17792 | 8  | 0,51 | 0,09 | 0  | 59 | 0  | 2   | 11  | 6  | 5  | 0 | 1  | 3  |
| RBM23              | common_19669 | 10 | 0,51 | 0,01 | 0  | 0  | 0  | 1   | 12  | 0  | 0  | 0 | 0  | 0  |
| BOLL               | common_4491  | 8  | 0,51 | 0,55 | 39 | 99 | 34 | 107 | 162 | 72 | 6  | 0 | 5  | 30 |
| ZFP64              | common_28127 | 9  | 0,51 | 0,39 | 19 | 89 | 8  | 26  | 194 | 2  | 7  | 0 | 24 | 20 |
| TTC28              | common_28965 | 4  | 0,51 | 0,36 | 27 | 30 | 1  | 112 | 60  | 53 | 9  | 4 | 23 | 43 |
| MGST2              | common_7257  | 8  | 0,51 | 0,02 | 1  | 0  | 5  | 1   | 0   | 1  | 2  | 6 | 0  | 4  |
| NGF                | common_1697  | 10 | 0,51 | 0,19 | 14 | 97 | 3  | 17  | 35  | 1  | 12 | 0 | 6  | 5  |
| TIMP3              | common_29049 | 4  | 0,51 | 0,06 | 3  | 21 | 1  | 10  | 3   | 3  | 5  | 3 | 0  | 13 |

|                      |              |    |      |      |    |    |    |     |     |    |    |    |    |    |
|----------------------|--------------|----|------|------|----|----|----|-----|-----|----|----|----|----|----|
| MME                  | common_6123  | 16 | 0,51 | 0,10 | 12 | 56 | 3  | 5   | 5   | 1  | 8  | 0  | 1  | 7  |
| LPHN2                | common_1440  | 20 | 0,51 | 0,05 | 2  | 38 | 0  | 4   | 0   | 0  | 4  | 0  | 0  | 1  |
| TENM3                | common_7440  | 9  | 0,51 | 0,10 | 0  | 64 | 0  | 9   | 13  | 0  | 12 | 0  | 0  | 0  |
| ZNF85                | common_26222 | 8  | 0,51 | 0,15 | 0  | 81 | 1  | 18  | 20  | 25 | 2  | 0  | 0  | 2  |
| SPINT2               | common_26502 | 10 | 0,51 | 0,20 | 0  | 1  | 18 | 0   | 177 | 0  | 2  | 0  | 0  | 1  |
| STARD13              | common_19220 | 9  | 0,51 | 0,02 | 0  | 1  | 0  | 0   | 1   | 0  | 5  | 1  | 0  | 8  |
| CELF2                | common_14692 | 13 | 0,51 | 0,18 | 24 | 3  | 0  | 9   | 133 | 3  | 4  | 0  | 3  | 5  |
| CDKL2                | common_6989  | 11 | 0,51 | 0,28 | 36 | 5  | 17 | 5   | 200 | 6  | 1  | 0  | 7  | 2  |
| ZNF461               | common_26458 | 12 | 0,51 | 0,06 | 0  | 42 | 2  | 4   | 2   | 6  | 0  | 0  | 0  | 0  |
| XRCC5                | common_4610  | 3  | 0,51 | 0,01 | 2  | 4  | 2  | 1   | 0   | 3  | 0  | 0  | 0  | 0  |
| SDC2                 | common_12855 | 15 | 0,51 | 0,10 | 1  | 86 | 0  | 9   | 0   | 0  | 5  | 0  | 0  | 1  |
| CXCL2                | common_6981  | 12 | 0,51 | 0,03 | 3  | 1  | 5  | 0   | 0   | 3  | 15 | 0  | 3  | 1  |
| FAM174B              | common_21445 | 8  | 0,51 | 0,08 | 0  | 2  | 17 | 1   | 61  | 0  | 1  | 0  | 0  | 0  |
| TLR3                 | common_7488  | 5  | 0,51 | 0,03 | 0  | 0  | 0  | 1   | 1   | 0  | 0  | 17 | 0  | 12 |
| ZNF829;ZNF568        | common_26465 | 14 | 0,51 | 0,15 | 0  | 83 | 0  | 21  | 19  | 22 | 1  | 0  | 0  | 5  |
| EFHA2                | common_12269 | 8  | 0,51 | 0,12 | 8  | 90 | 0  | 6   | 2   | 0  | 12 | 0  | 0  | 1  |
| GNAL                 | common_24749 | 10 | 0,51 | 0,03 | 3  | 10 | 6  | 1   | 4   | 0  | 2  | 0  | 0  | 2  |
| C1orf114             | common_2289  | 9  | 0,51 | 0,42 | 49 | 96 | 0  | 83  | 77  | 64 | 2  | 0  | 24 | 28 |
| ROR1                 | common_1364  | 12 | 0,51 | 0,01 | 1  | 1  | 0  | 0   | 8   | 0  | 5  | 0  | 0  | 0  |
| PLIN2                | common_13359 | 2  | 0,51 | 0,03 | 0  | 7  | 2  | 2   | 2   | 11 | 0  | 0  | 0  | 11 |
| CMAHP                | common_9178  | 5  | 0,51 | 0,06 | 5  | 7  | 0  | 7   | 10  | 2  | 0  | 3  | 3  | 20 |
| LYNX1                | common_13127 | 14 | 0,51 | 0,11 | 4  | 77 | 0  | 12  | 6   | 5  | 0  | 0  | 1  | 4  |
| RP11-1102P16.1       | common_12728 | 5  | 0,51 | 0,15 | 3  | 63 | 5  | 22  | 29  | 2  | 14 | 0  | 6  | 4  |
| RIMS1                | common_9922  | 9  | 0,51 | 0,11 | 1  | 81 | 0  | 7   | 15  | 1  | 3  | 0  | 0  | 1  |
| FAM159A              | common_1264  | 5  | 0,51 | 0,29 | 16 | 73 | 12 | 27  | 140 | 16 | 2  | 0  | 2  | 3  |
| GABPB2               | common_1915  | 12 | 0,51 | 0,01 | 0  | 1  | 0  | 1   | 0   | 2  | 0  | 2  | 0  | 5  |
| SFTPD                | common_15253 | 3  | 0,51 | 0,02 | 0  | 15 | 1  | 0   | 0   | 0  | 0  | 0  | 0  | 0  |
| EFCAB12              | common_5932  | 8  | 0,51 | 0,02 | 0  | 0  | 0  | 2   | 5   | 1  | 14 | 0  | 0  | 1  |
| OBSL1                | common_4712  | 6  | 0,51 | 0,31 | 17 | 67 | 4  | 48  | 165 | 4  | 6  | 0  | 0  | 2  |
| RNF217               | common_10212 | 13 | 0,51 | 0,11 | 8  | 60 | 4  | 11  | 1   | 2  | 17 | 0  | 1  | 2  |
| KRT8                 | common_18073 | 5  | 0,51 | 0,02 | 0  | 1  | 12 | 0   | 0   | 0  | 0  | 2  | 0  | 2  |
| BCL2L2;BCL2L2-PABPN1 | common_19685 | 5  | 0,50 | 0,02 | 0  | 0  | 0  | 0   | 0   | 0  | 16 | 0  | 0  | 1  |
| ADAM32               | common_12529 | 7  | 0,50 | 0,54 | 22 | 29 | 40 | 123 | 205 | 55 | 17 | 5  | 10 | 39 |

|            |              |    |      |      |    |    |    |     |     |    |    |    |    |    |
|------------|--------------|----|------|------|----|----|----|-----|-----|----|----|----|----|----|
| ZC3H13     | common_19295 | 15 | 0,50 | 0,02 | 0  | 0  | 0  | 0   | 20  | 0  | 0  | 0  | 0  | 0  |
| KCNS2      | common_12868 | 7  | 0,50 | 0,38 | 9  | 59 | 12 | 102 | 180 | 7  | 14 | 0  | 0  | 4  |
| ZAR1       | common_6890  | 10 | 0,50 | 0,41 | 19 | 24 | 16 | 84  | 198 | 11 | 14 | 11 | 21 | 12 |
| ATRAID;CAD | common_3231  | 5  | 0,50 | 0,03 | 0  | 1  | 2  | 0   | 27  | 0  | 0  | 0  | 1  | 0  |
| VRK2       | common_3458  | 10 | 0,50 | 0,04 | 0  | 0  | 33 | 0   | 1   | 0  | 0  | 6  | 0  | 1  |
| HOOK1      | common_1332  | 12 | 0,50 | 0,03 | 0  | 0  | 21 | 0   | 0   | 0  | 10 | 0  | 0  | 1  |
| PCDP1      | common_4020  | 6  | 0,50 | 0,02 | 1  | 6  | 0  | 0   | 0   | 0  | 11 | 0  | 0  | 1  |
| FAM196A    | common_15826 | 11 | 0,50 | 0,30 | 0  | 77 | 0  | 38  | 168 | 4  | 10 | 0  | 0  | 2  |
| ZNF132     | common_27416 | 10 | 0,50 | 0,28 | 24 | 97 | 0  | 36  | 56  | 54 | 3  | 0  | 0  | 12 |
| ZNF483     | common_13936 | 2  | 0,50 | 0,35 | 14 | 66 | 2  | 32  | 196 | 29 | 12 | 0  | 3  | 2  |
| ARL10      | common_8763  | 10 | 0,50 | 0,08 | 10 | 28 | 0  | 19  | 17  | 4  | 0  | 0  | 0  | 1  |
| TNIP3      | common_7204  | 2  | 0,50 | 0,22 | 14 | 32 | 1  | 28  | 45  | 67 | 16 | 0  | 4  | 18 |
| SORCS2     | common_6678  | 8  | 0,50 | 0,10 | 6  | 85 | 1  | 1   | 0   | 0  | 5  | 0  | 0  | 1  |
| CADPS2     | common_11674 | 17 | 0,50 | 0,01 | 0  | 0  | 0  | 0   | 1   | 0  | 10 | 0  | 0  | 0  |
| HTRA1      | common_15772 | 15 | 0,50 | 0,02 | 0  | 12 | 0  | 1   | 0   | 0  | 2  | 0  | 0  | 2  |
| PIK3R1     | common_7853  | 9  | 0,50 | 0,03 | 0  | 11 | 0  | 2   | 0   | 12 | 0  | 0  | 0  | 7  |
| RHOF       | common_18836 | 8  | 0,50 | 0,02 | 0  | 0  | 1  | 1   | 0   | 6  | 0  | 0  | 0  | 16 |
| ACP5       | common_25803 | 7  | 0,50 | 0,31 | 9  | 48 | 34 | 14  | 145 | 18 | 2  | 11 | 23 | 7  |
| NUMBL      | common_26611 | 10 | 0,50 | 0,07 | 0  | 0  | 0  | 0   | 68  | 0  | 0  | 0  | 0  | 0  |
| CRH        | common_12693 | 7  | 0,50 | 0,05 | 0  | 49 | 0  | 0   | 0   | 3  | 3  | 0  | 0  | 0  |
| GPC6       | common_19414 | 13 | 0,50 | 0,11 | 6  | 90 | 0  | 6   | 0   | 3  | 6  | 0  | 0  | 0  |
| PAQR9      | common_6051  | 8  | 0,50 | 0,15 | 16 | 80 | 2  | 44  | 0   | 7  | 2  | 0  | 0  | 0  |
| HENMT1     | common_1578  | 4  | 0,50 | 0,30 | 8  | 17 | 40 | 28  | 185 | 12 | 0  | 0  | 2  | 10 |
| ANKRD24    | common_25494 | 2  | 0,50 | 0,16 | 4  | 24 | 2  | 26  | 92  | 1  | 8  | 0  | 0  | 0  |
| FN3K       | common_24652 | 5  | 0,50 | 0,02 | 0  | 2  | 0  | 4   | 0   | 2  | 10 | 0  | 0  | 1  |
| DPYSL3     | common_8483  | 9  | 0,50 | 0,14 | 11 | 86 | 0  | 8   | 26  | 1  | 13 | 0  | 0  | 1  |
| SEMA7A     | common_21150 | 13 | 0,50 | 0,05 | 1  | 12 | 0  | 1   | 37  | 0  | 0  | 0  | 0  | 0  |
| CELF4      | common_24890 | 2  | 0,50 | 0,26 | 6  | 63 | 10 | 8   | 145 | 5  | 10 | 6  | 0  | 10 |
| FKBP5      | common_9629  | 6  | 0,50 | 0,01 | 0  | 1  | 6  | 3   | 0   | 0  | 0  | 0  | 0  | 4  |
| FAM19A4    | common_5599  | 12 | 0,50 | 0,22 | 8  | 94 | 15 | 41  | 35  | 10 | 10 | 0  | 0  | 11 |
| MTHFD2     | common_3644  | 12 | 0,50 | 0,18 | 0  | 0  | 0  | 0   | 182 | 0  | 0  | 0  | 0  | 0  |
| BSX        | common_17389 | 7  | 0,50 | 0,11 | 4  | 87 | 1  | 14  | 5   | 2  | 2  | 0  | 0  | 0  |
| SYT9       | common_16132 | 11 | 0,50 | 0,28 | 4  | 95 | 1  | 94  | 40  | 7  | 15 | 0  | 3  | 19 |



|         |              |    |      |      |    |    |    |    |    |    |    |    |   |   |
|---------|--------------|----|------|------|----|----|----|----|----|----|----|----|---|---|
| DPP10   | common_3995  | 12 | 0,50 | 0,24 | 13 | 98 | 28 | 26 | 39 | 14 | 12 | 0  | 9 | 4 |
| PXDC1   | common_9003  | 9  | 0,50 | 0,02 | 1  | 17 | 0  | 3  | 0  | 1  | 2  | 0  | 0 | 0 |
| EXOSC6  | common_22514 | 8  | 0,50 | 0,01 | 0  | 0  | 0  | 8  | 1  | 1  | 0  | 0  | 0 | 1 |
| P2RY2   | common_16987 | 12 | 0,50 | 0,02 | 0  | 0  | 7  | 0  | 2  | 1  | 5  | 0  | 0 | 4 |
| PHACTR1 | common_9097  | 5  | 0,50 | 0,03 | 0  | 1  | 0  | 0  | 0  | 0  | 0  | 15 | 5 | 5 |
